# Supplementary material
Source: MDPI journal article supplement (https://www.mdpi.com/1424-8247/16/11/1562)
Supplement: s1 [file s1]

## SUPPLEMENTARY MATERIAL

# Synthesis of pyrrolo[3,4-*b*]pyridin-5-ones via Ugi-Zhu reaction and In vitro-In silico studies against breast carcinoma

Ivette Morales-Salazar<sup>1</sup>, Carlos E. Garduño-Albino<sup>1</sup>, Flora P. Montes-Enríquez<sup>1</sup>, Eduardo González-Zamora<sup>1</sup>, Dania A. Nava-Tapia<sup>2</sup>, Napoleón Navarro-Tito<sup>2,\*</sup>, Leonardo David Herrera-Zúñiga<sup>1,\*</sup>, and Alejandro Islas-Jácome<sup>1,\*</sup>

<sup>1</sup> Departamento de Química, Universidad Autónoma Metropolitana-Iztapalapa, Av. Ferrocarril San Rafael Atlixco 186, Col.

Leyes de Reforma 1A Sección, Iztapalapa, Ciudad de México 09310, Mexico;

ivette649\_tatu@hotmail.com (I.M.-S.); charlywuiller199912101@gmail.com (C.E.G.-A.); montesenriquez98@outlook.com

(F.P.M.-E.); egz@xanum.uam.mx (E.G.-Z.)

<sup>2</sup> Laboratorio de Biología Celular del Cáncer, Universidad Autónoma de Guerrero,

Chilpancingo de los Bravo 39086, México; danianavatapia@uagro.mx (D.A.N.-T.)

\* Correspondence: nnavarro@uagro.mx (N.N.-T.); leo.hz@xanum.uam.mx (L.D.H.-Z.); aij@xanum.uam.mx (A.I.-J)

| CONTENTS                                                                                | PAGE |
|-----------------------------------------------------------------------------------------|------|
| 1 Workflow                                                                              | S3   |
| 2 Compounds <i>in vitro</i> assayed                                                     | S4   |
| • Table S1. Compounds <i>in vitro</i> assayed                                           | S4   |
| 3 Spectra of new compounds                                                              | S5   |
| • Figure S1. <sup>1</sup> H NMR spectrum of the compound <b>1g</b>                      | S5   |
| • Figure S2. <sup>13</sup> C NMR spectrum of the compound <b>1g</b>                     | S6   |
| • Figure S3. COSY spectrum of the compound <b>1g</b>                                    | S7   |
| • Figure S4. HSQC ( <sup>1</sup> H, <sup>13</sup> C) spectrum of the compound <b>1g</b> | S8   |
| • Figure S5. HMBC ( <sup>1</sup> H, <sup>13</sup> C) spectrum of the compound <b>1g</b> | S9   |
| • Figure S6. HRMS spectrum of the compound <b>1g</b>                                    | S10  |
| • Figure S7. FT-IR (ATR) spectrum of the compound <b>1g</b>                             | S11  |
| • Figure S8. <sup>1</sup> H NMR spectrum of the compound <b>1h</b>                      | S12  |
| • Figure S9. <sup>13</sup> C NMR spectrum of the compound <b>1h</b>                     | S13  |
| • Figure S10. HRMS spectrum of the compound <b>1h</b>                                   | S14  |
| • Figure S11. FT-IR (ATR) spectrum of the compound <b>1h</b>                            | S15  |
| • Figure S12. <sup>1</sup> H NMR spectrum of the compound <b>1i</b>                     | S16  |
| • Figure S13. <sup>13</sup> C NMR spectrum of the compound <b>1i</b>                    | S17  |
| • Figure S14. HRMS spectrum of the compound <b>1i</b>                                   | S18  |
| • Figure S15. FT-IR (ATR) spectrum of the compound <b>1i</b>                            | S19  |
| • Figure S16. <sup>1</sup> H NMR spectrum of the compound <b>1j</b>                     | S20  |
| • Figure S17. <sup>13</sup> C NMR spectrum of the compound <b>1j</b>                    | S21  |
| • Figure S18. HRMS spectrum of the compound <b>1j</b>                                   | S22  |
| • Figure S19. FT-IR (ATR) spectrum of the compound <b>1j</b>                            | S23  |
| • Figure S20. <sup>1</sup> H NMR spectrum of the compound <b>1k</b>                     | S24  |

|   |                                                                                                                                     |     |
|---|-------------------------------------------------------------------------------------------------------------------------------------|-----|
|   | • <b>Figure S21.</b> $^{13}\text{C}$ NMR spectrum of the compound <b>1k</b>                                                         | S25 |
|   | • <b>Figure S22.</b> HRMS spectrum of the compound <b>1k</b>                                                                        | S26 |
|   | • <b>Figure S23.</b> FT-IR (ATR) spectrum of the compound <b>1k</b>                                                                 | S27 |
| 4 | <b><i>In silico</i> studies</b>                                                                                                     | S28 |
|   | • <b>Table S2.</b> Receptor and Cavity Information                                                                                  | S28 |
|   | • <b>Table S3.</b> Multiligand and Multitarget Docking Summary of <b>1a-k</b> with 20 Target Proteins                               | S34 |
|   | • <b>Table S4.</b> Key ADMETox Predicted Properties of the compounds <b>1a-k</b>                                                    | S45 |
|   | • <b>Table S5.</b> Structural Time Equilibrium Descriptors                                                                          | S47 |
|   | • <b>Table S6.</b> Decomposition of Key Amino Acids for Interaction at 5 Å Calculated Using MM/GBSA                                 | S48 |
|   | • <b>Table S7.</b> 2D and 3D Representations of Optimized Structures for Ligands <b>1a-k</b>                                        | S49 |
|   | • <b>Table S8.</b> Target Proteins. Ribbon representation of the 20 potential target proteins                                       | S51 |
|   | • <b>Figure S24.</b> Structure of Protein AKT <sub>1</sub>                                                                          | S55 |
|   | • <b>Figure S25.</b> Structure of Protein Ox <sub>2</sub> R                                                                         | S56 |
|   | • <b>Figure S26.</b> Superposition of Representative Structures from Simulations with Ligands <b>1f</b> , <b>1h</b> , and <b>1k</b> | S57 |
|   | • <b>Figure S27.</b> Blind Docking for Structures 5IU2 and 7NA8                                                                     | S58 |
|   | • <b>Movie 1</b>                                                                                                                    | S60 |
|   | • <b>Movie 2</b>                                                                                                                    | S60 |
| 5 | <b>Supplementary References</b>                                                                                                     | S60 |

## 1. Workflow

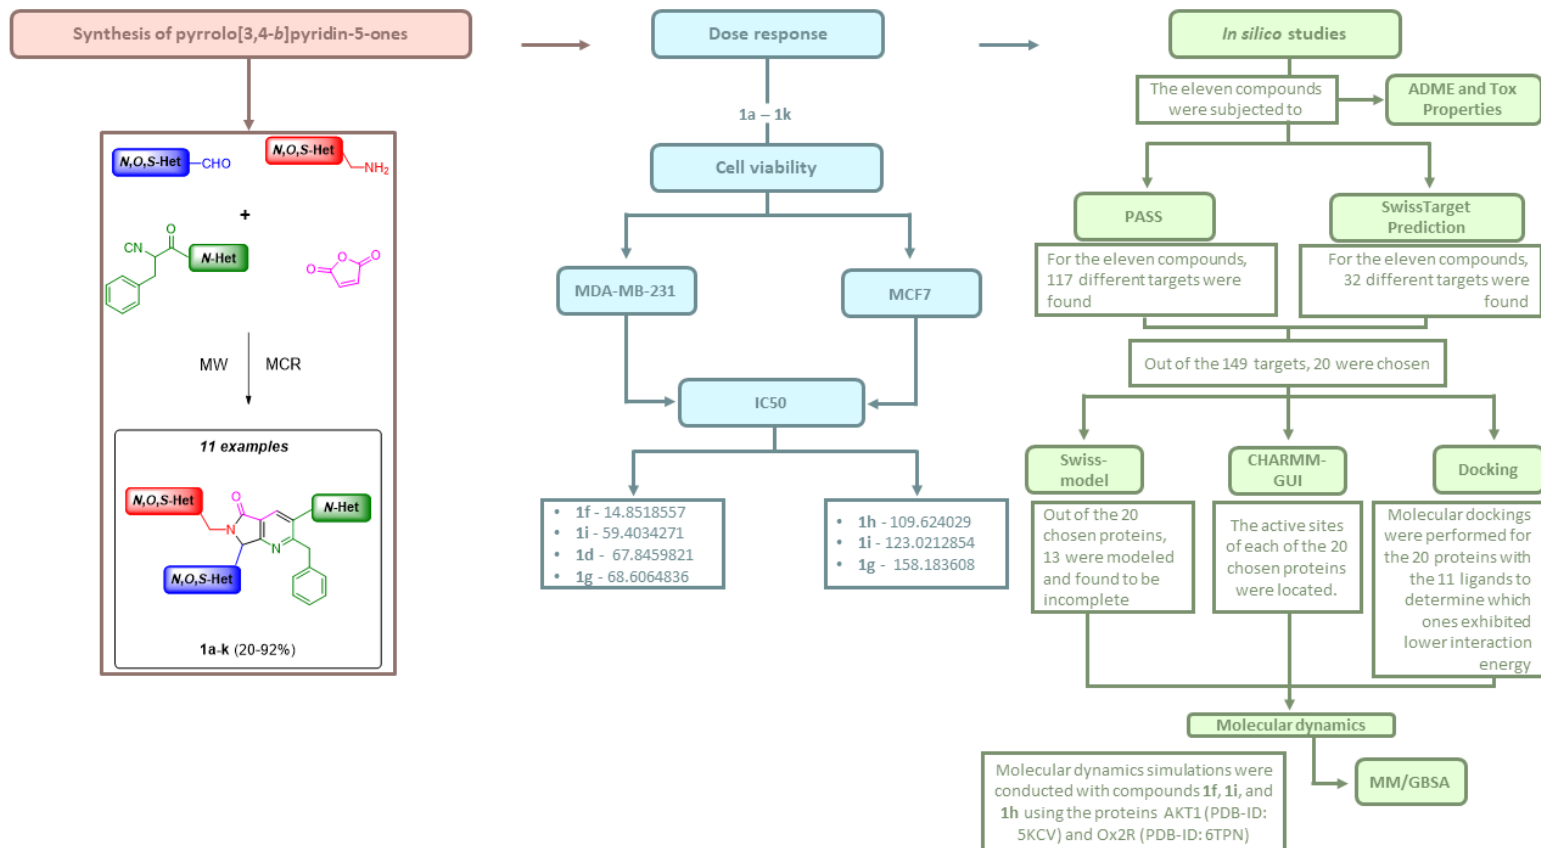

## 2 Compounds *in vitro* assayed

| Table S1. Compounds <i>in vitro</i> assayed                                                                    |                                                                                                                      |
|----------------------------------------------------------------------------------------------------------------|----------------------------------------------------------------------------------------------------------------------|
| 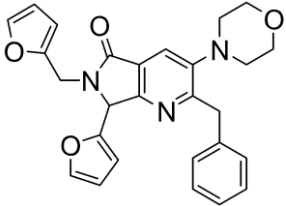 <p><b>1a</b> [Ref. S1]</p>   |  <p><b>1g</b> [New Compound]</p>   |
|  <p><b>1b</b> [Ref. S1]</p>   |  <p><b>1h</b> [New Compound]</p>   |
|  <p><b>1c</b> [Ref. S1]</p>   |  <p><b>1i</b> [New Compound]</p>   |
|  <p><b>1d</b> [Ref. S1]</p> |  <p><b>1j</b> [New Compound]</p> |
|  <p><b>1e</b> [Ref. S1]</p> |  <p><b>1k</b> [New Compound]</p> |
|  <p><b>1f</b> [Ref. S2]</p> |                                                                                                                      |

### 3 Spectra of new compounds

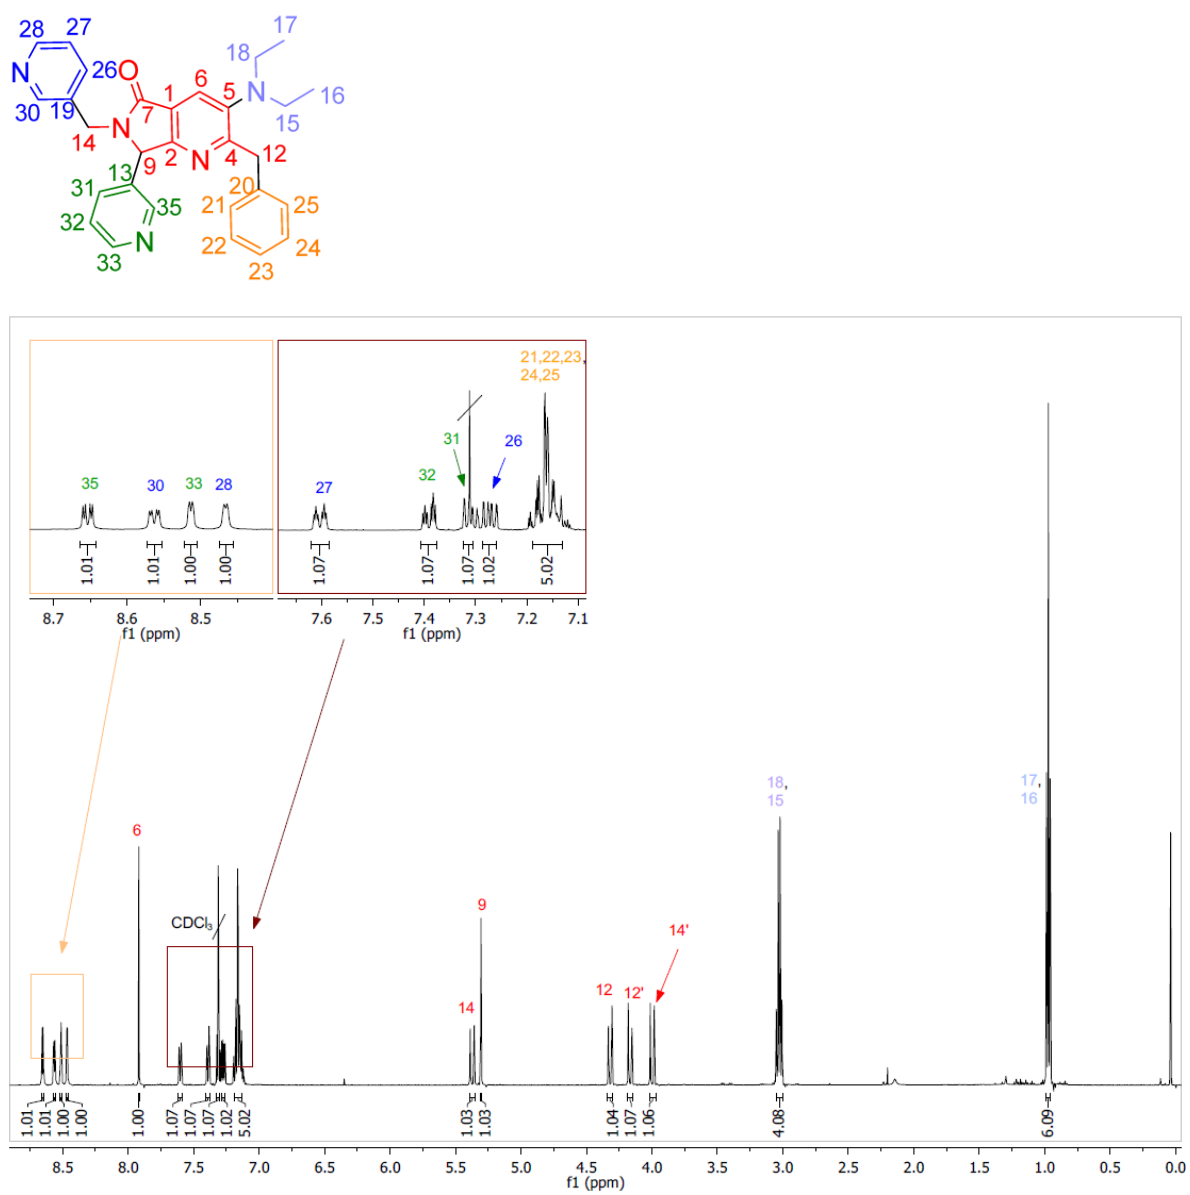

**Figure S1.** <sup>1</sup>H NMR spectrum of the compound **1g**

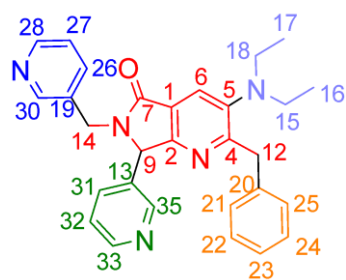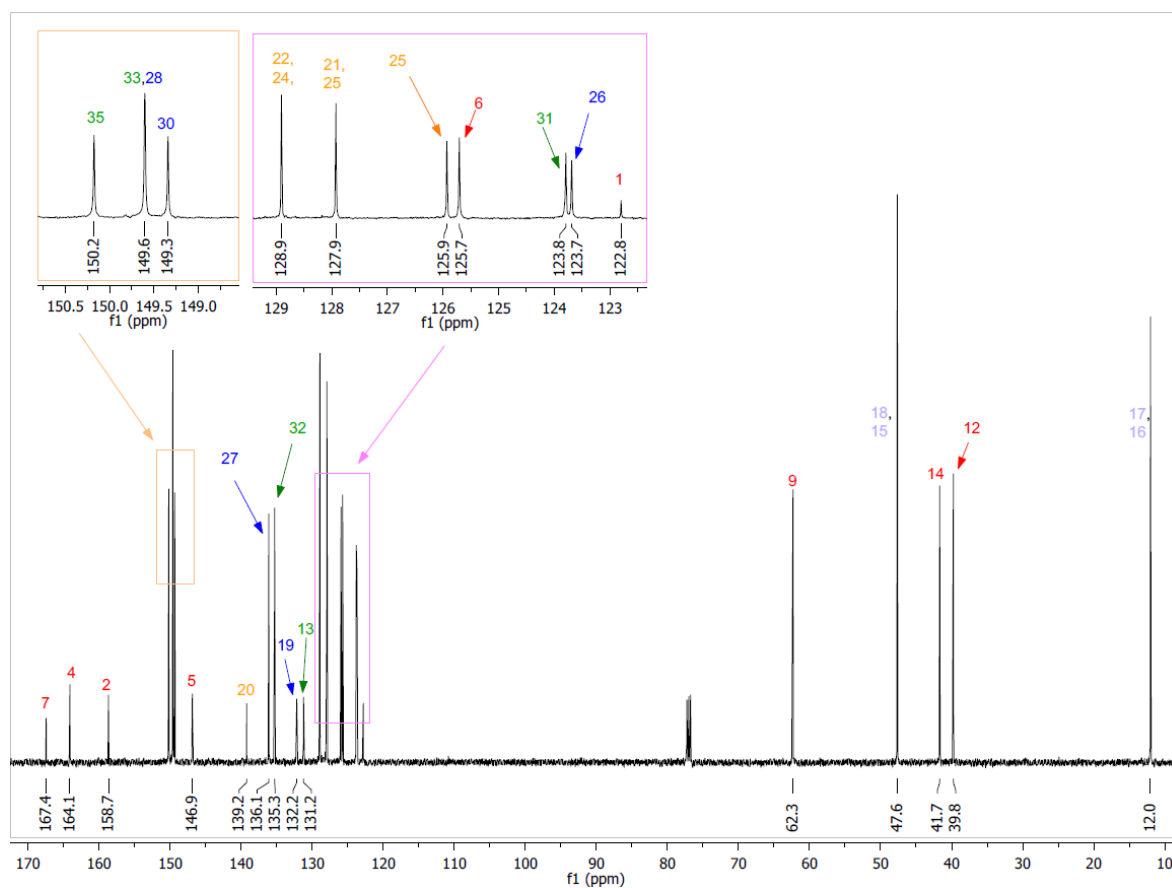

**Figure S2.**  $^{13}\text{C}$  NMR spectrum of the compound **1g**

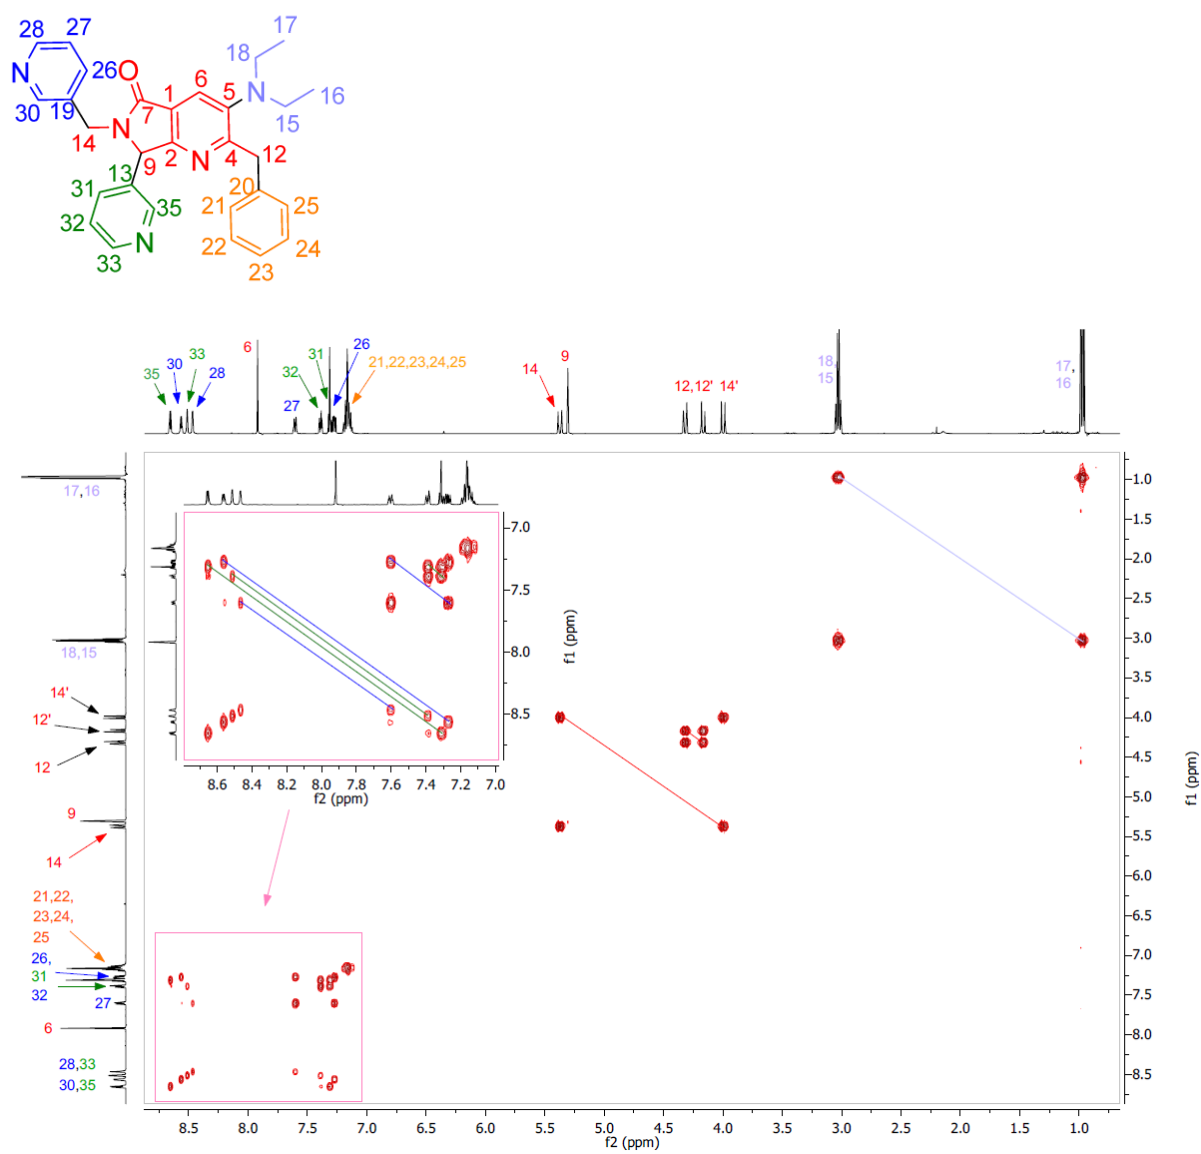

**Figure S3.** COSY spectrum of the compound **1g**

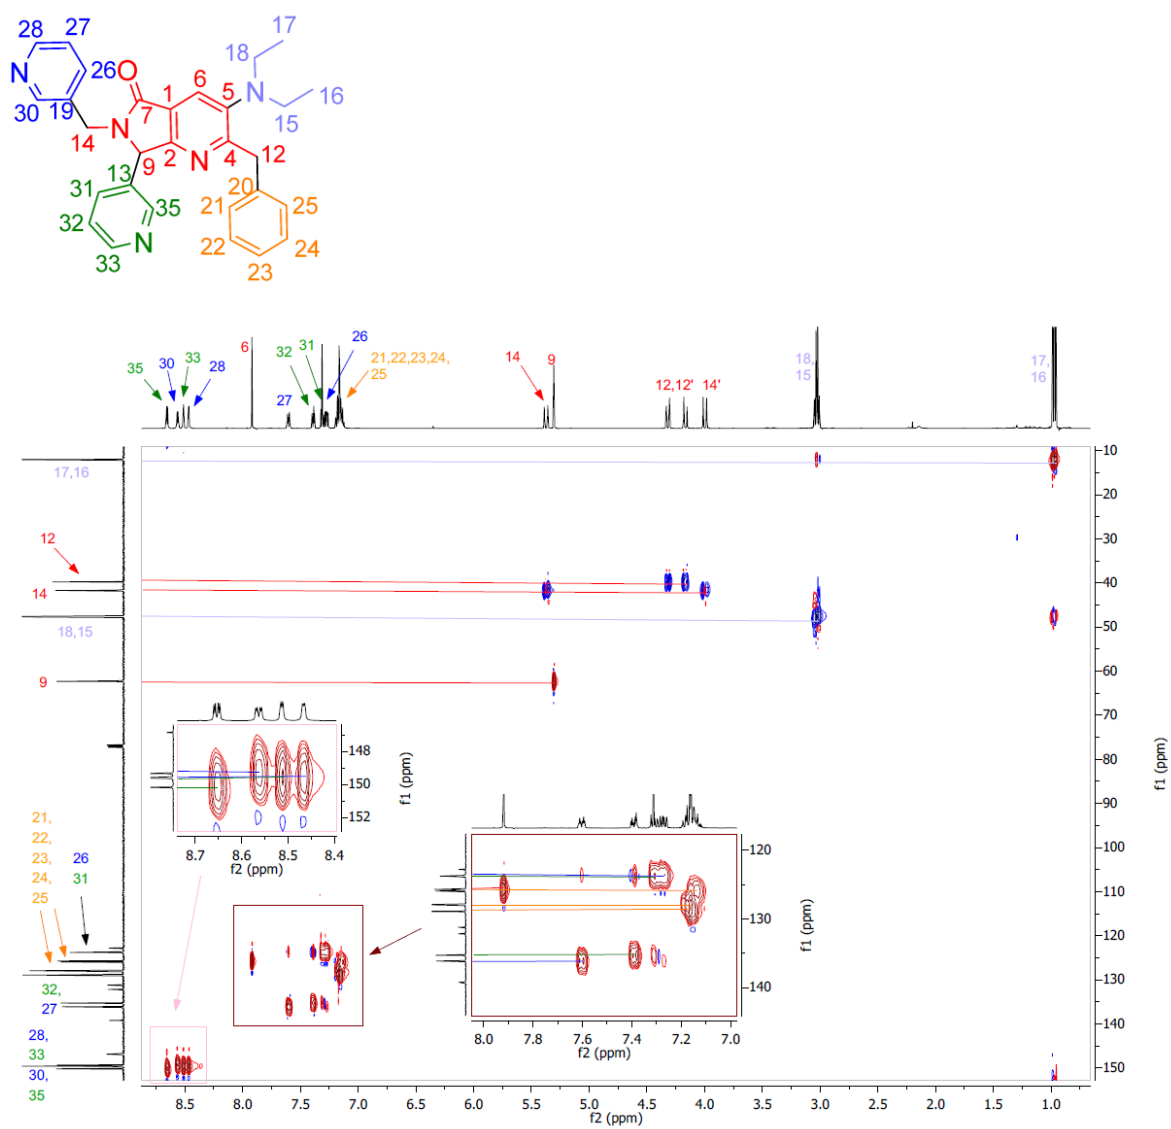

**Figure S4.** HSQC ( $^1\text{H}$ ,  $^{13}\text{C}$ ) spectrum of the compound **1g**



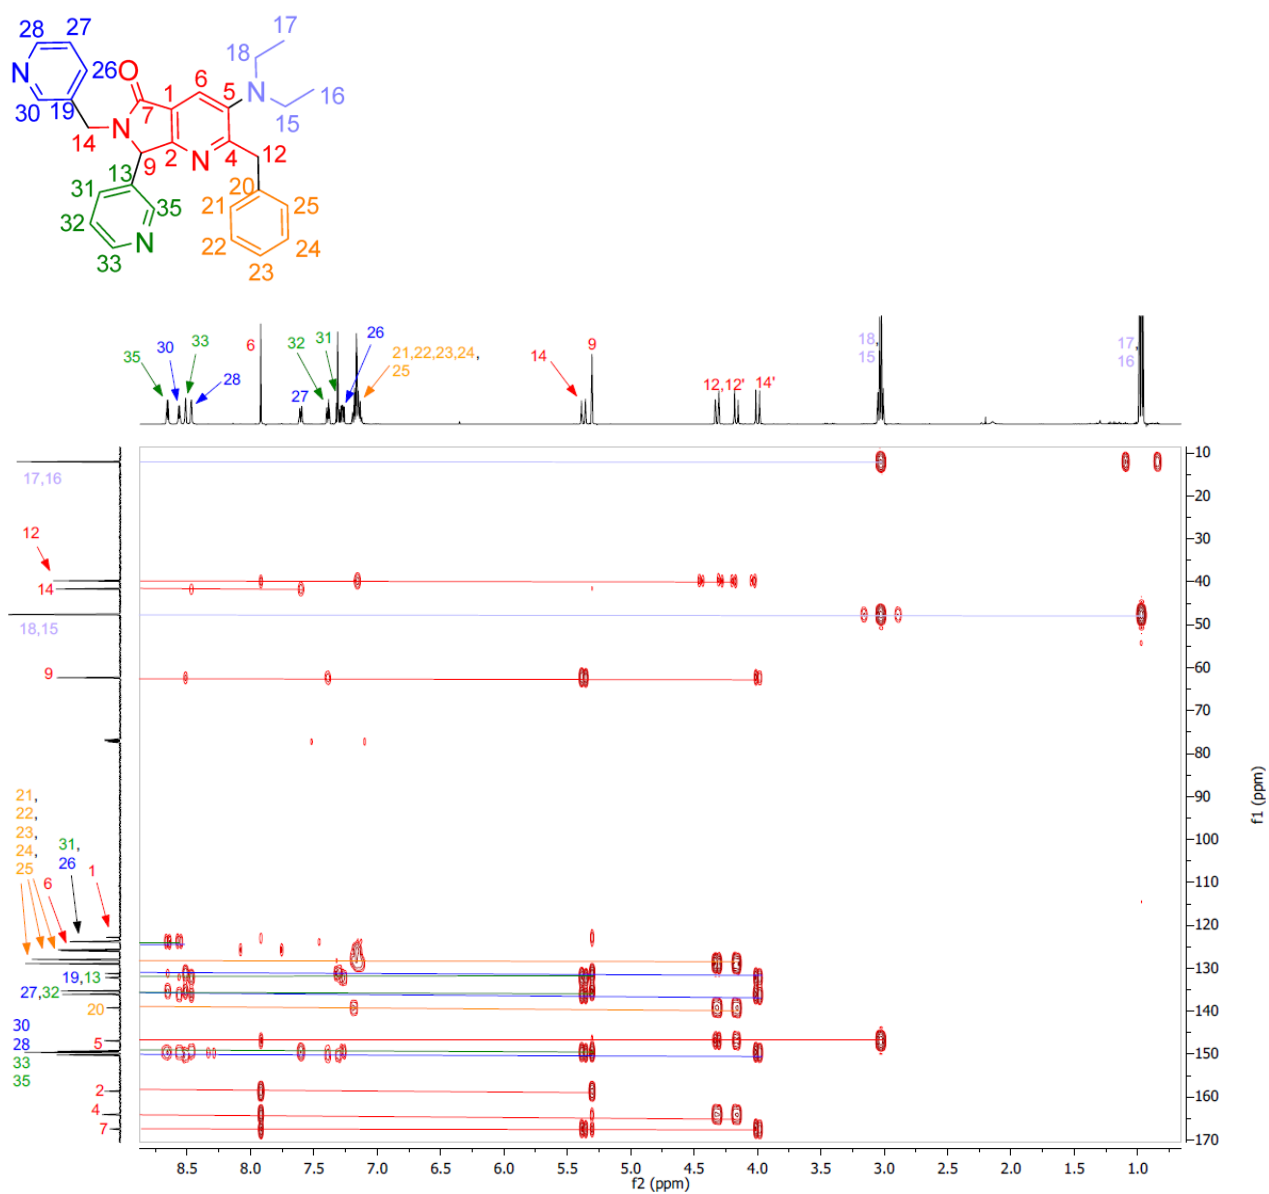

**Figure S5.** HMBC ( $^1\text{H}$ ,  $^{13}\text{C}$ ) spectrum of the compound **1g**

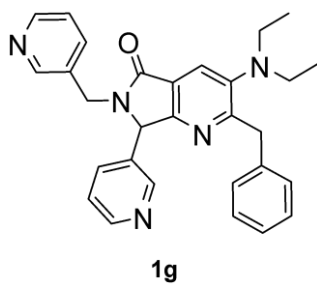

#### Acquisition Parameter

|             |          |                      |          |                  |           |
|-------------|----------|----------------------|----------|------------------|-----------|
| Source Type | ESI      | Ion Polarity         | Positive | Set Nebulizer    | 0.5 Bar   |
| Focus       | Active   |                      |          | Set Dry Heater   | 150 °C    |
| Scan Begin  | 50 m/z   | Set Capillary        | 4500 V   | Set Dry Gas      | 4.0 l/min |
| Scan End    | 3000 m/z | Set End Plate Offset | -500 V   | Set Divert Valve | Waste     |

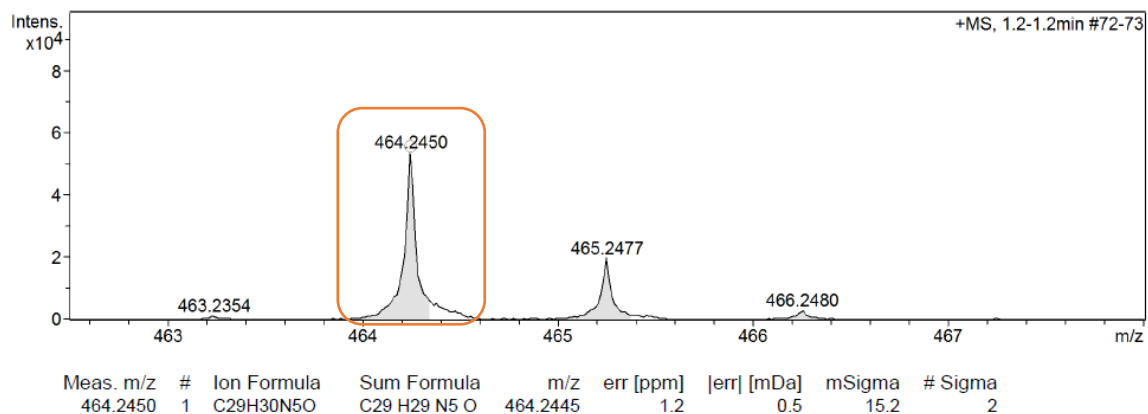

**Figure S6.** HRMS spectrum of the compound **1g**

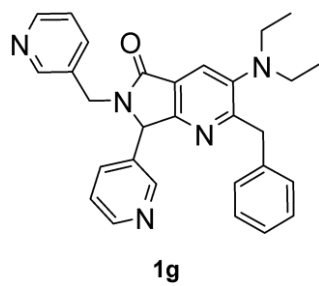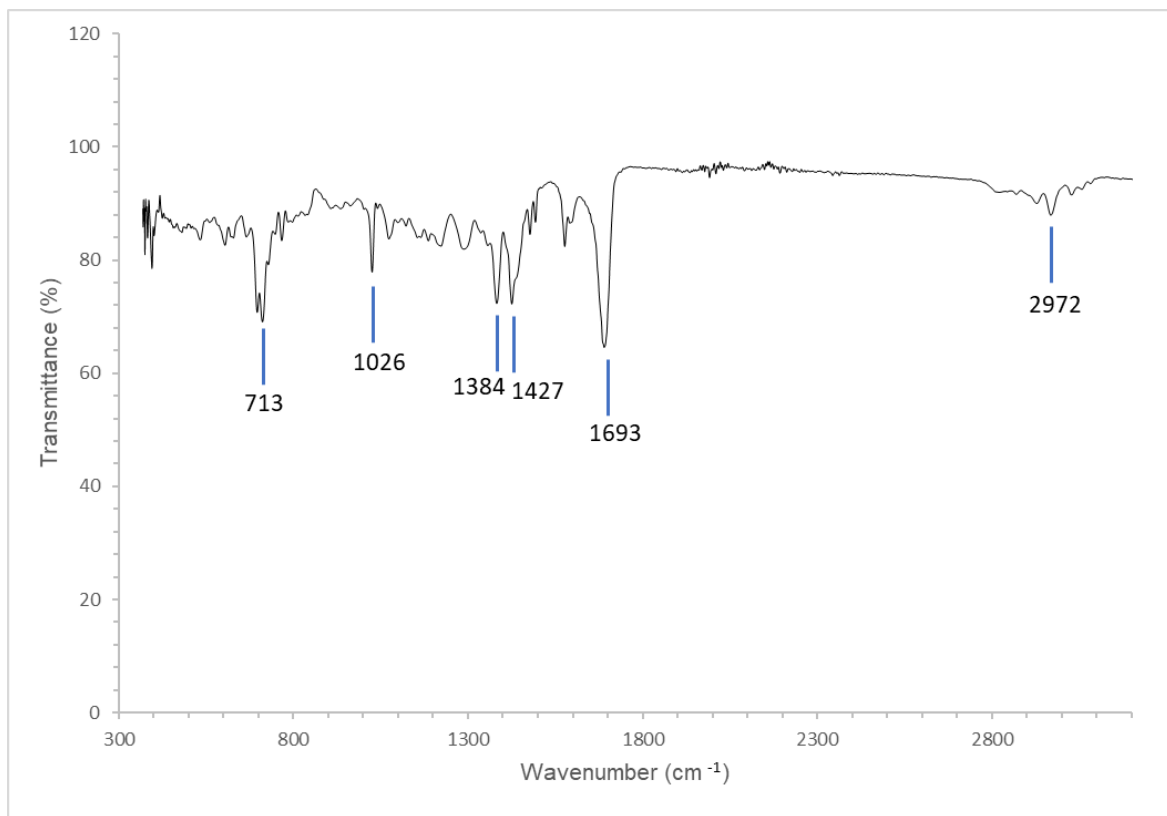

**Figure S7.** FT-IR (ATR) spectrum of the compound **1g**

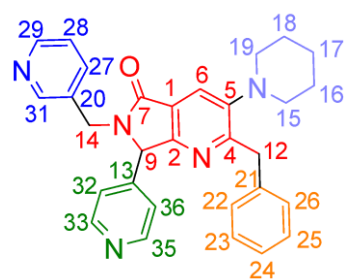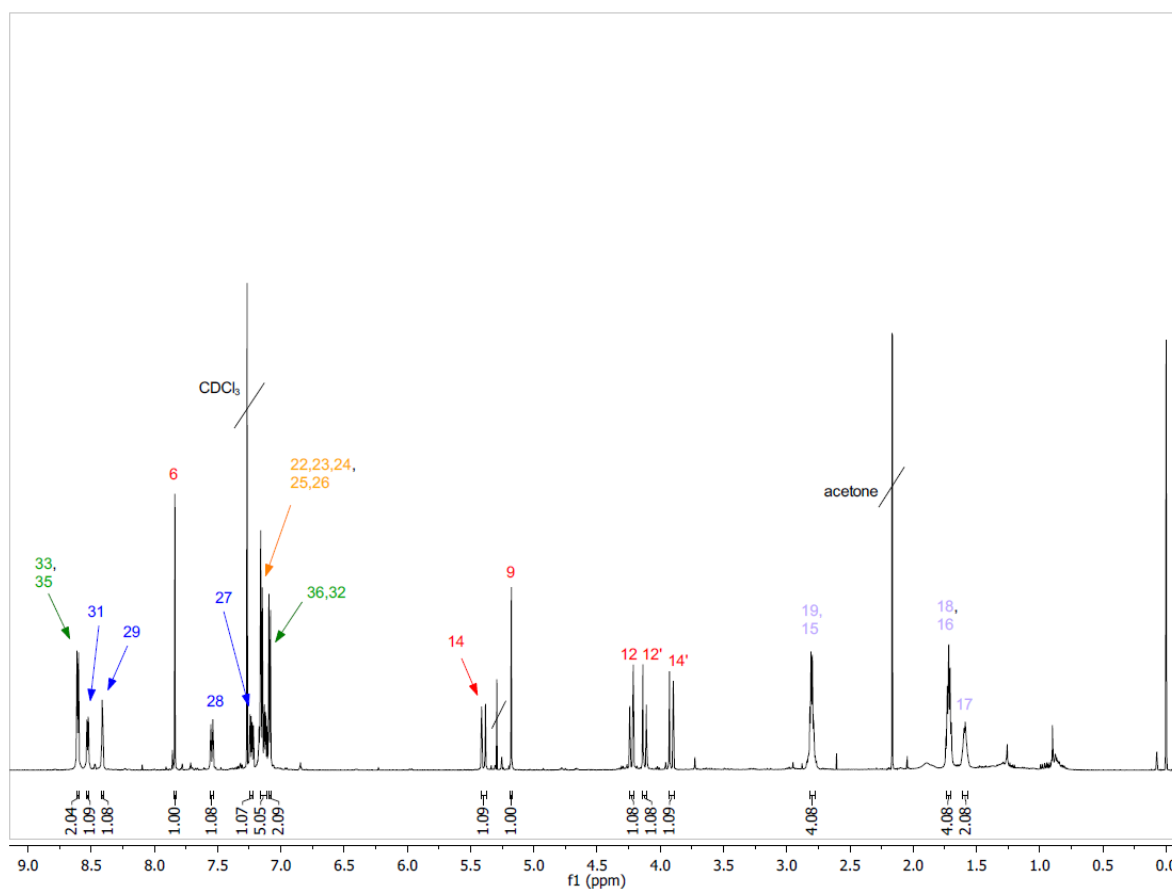

Figure S8.  $^1\text{H}$  NMR spectrum of the compound **1h**

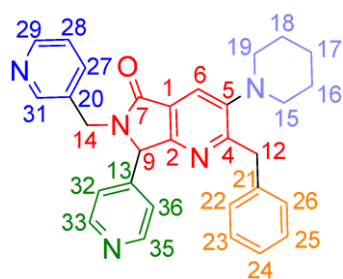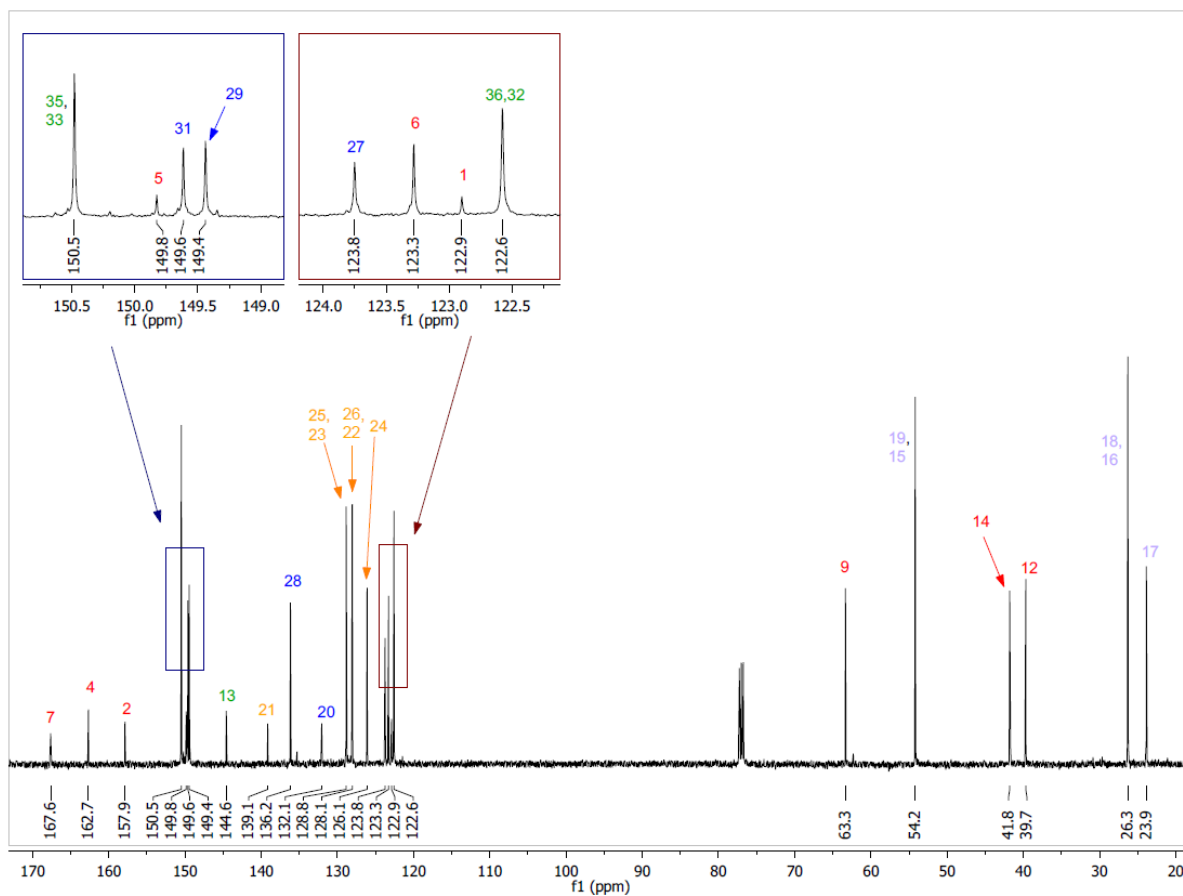

Figure S9.  $^{13}\text{C}$  NMR spectrum of the compound **1h**

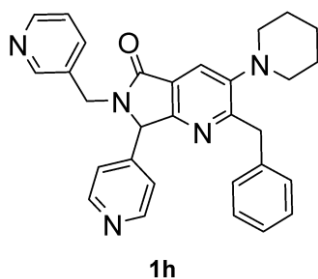

#### Acquisition Parameter

|             |          |                      |          |                  |           |
|-------------|----------|----------------------|----------|------------------|-----------|
| Source Type | ESI      | Ion Polarity         | Positive | Set Nebulizer    | 0.5 Bar   |
| Focus       | Active   |                      |          | Set Dry Heater   | 150 °C    |
| Scan Begin  | 50 m/z   | Set Capillary        | 4500 V   | Set Dry Gas      | 4.0 l/min |
| Scan End    | 3000 m/z | Set End Plate Offset | -500 V   | Set Divert Valve | Waste     |

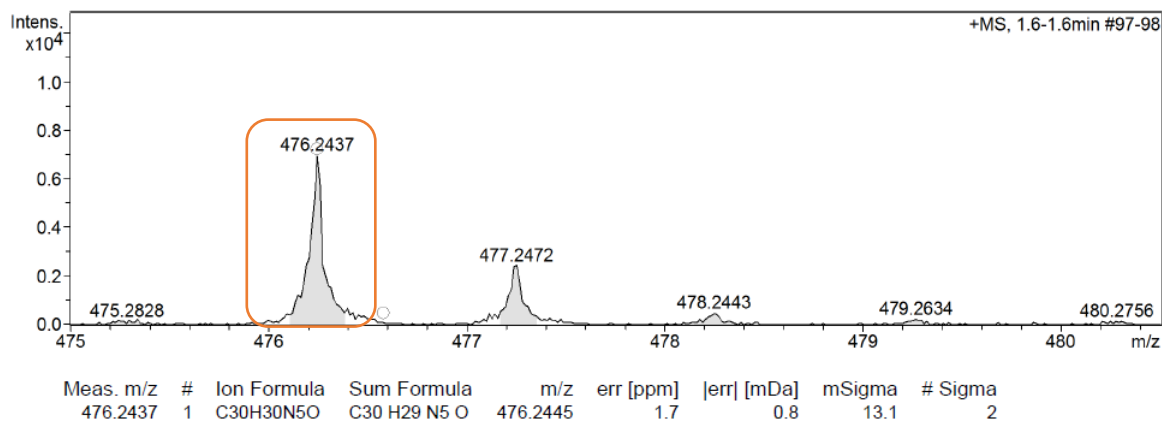

**Figure S10.** HRMS spectrum of the compound **1h**

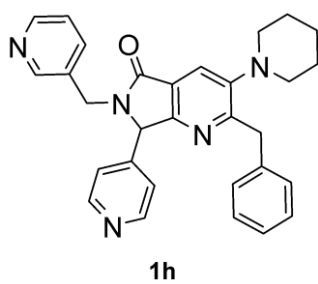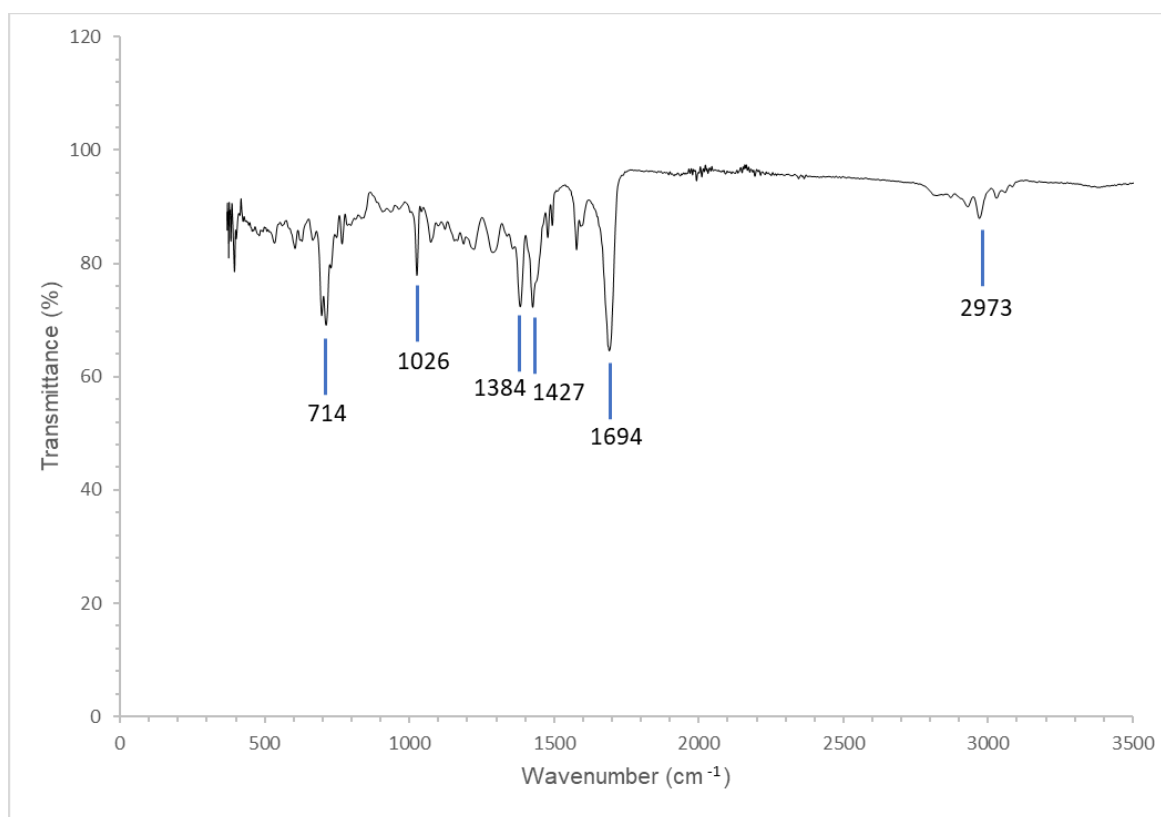

**Figure S11.** FT-IR (ATR) spectrum of the compound **1h**

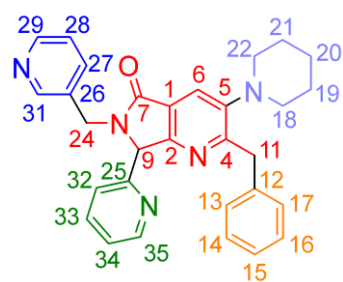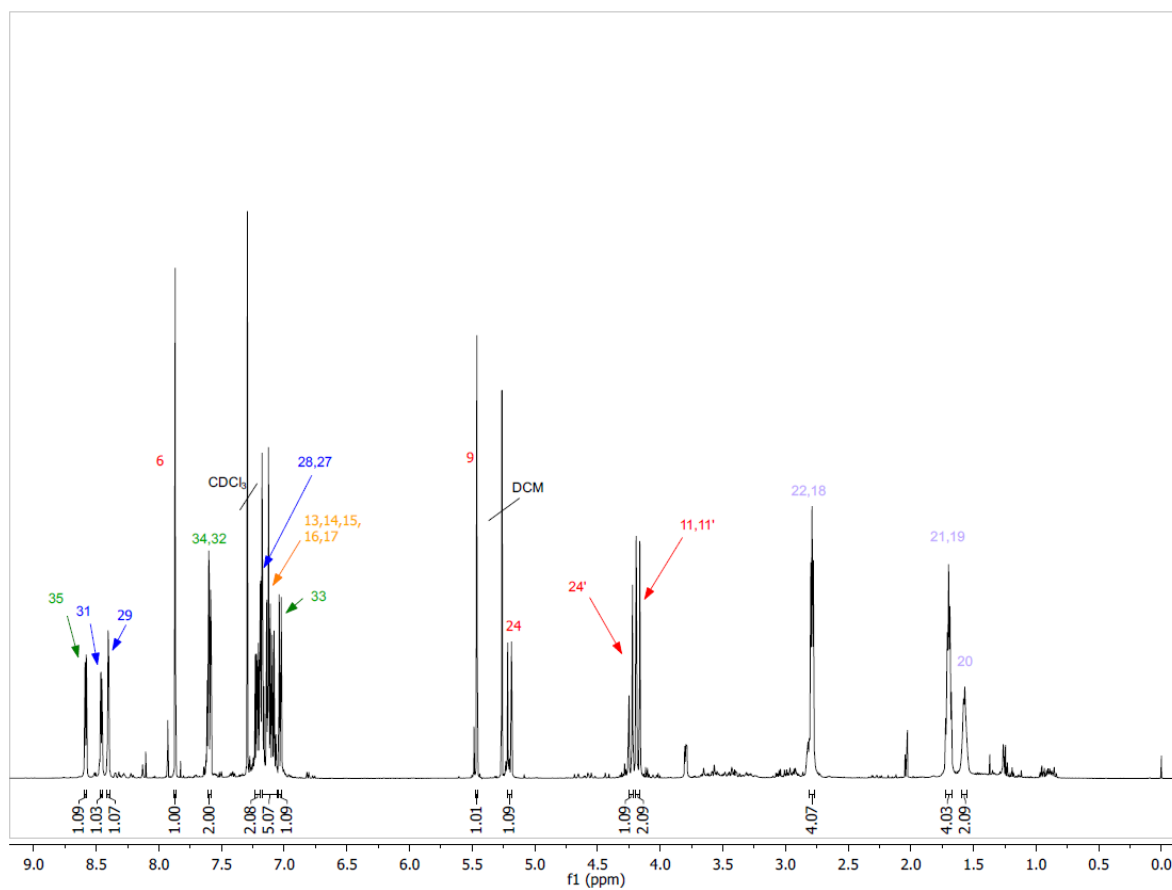

**Figure S12.**  $^1\text{H}$  NMR spectrum of the compound **1i**



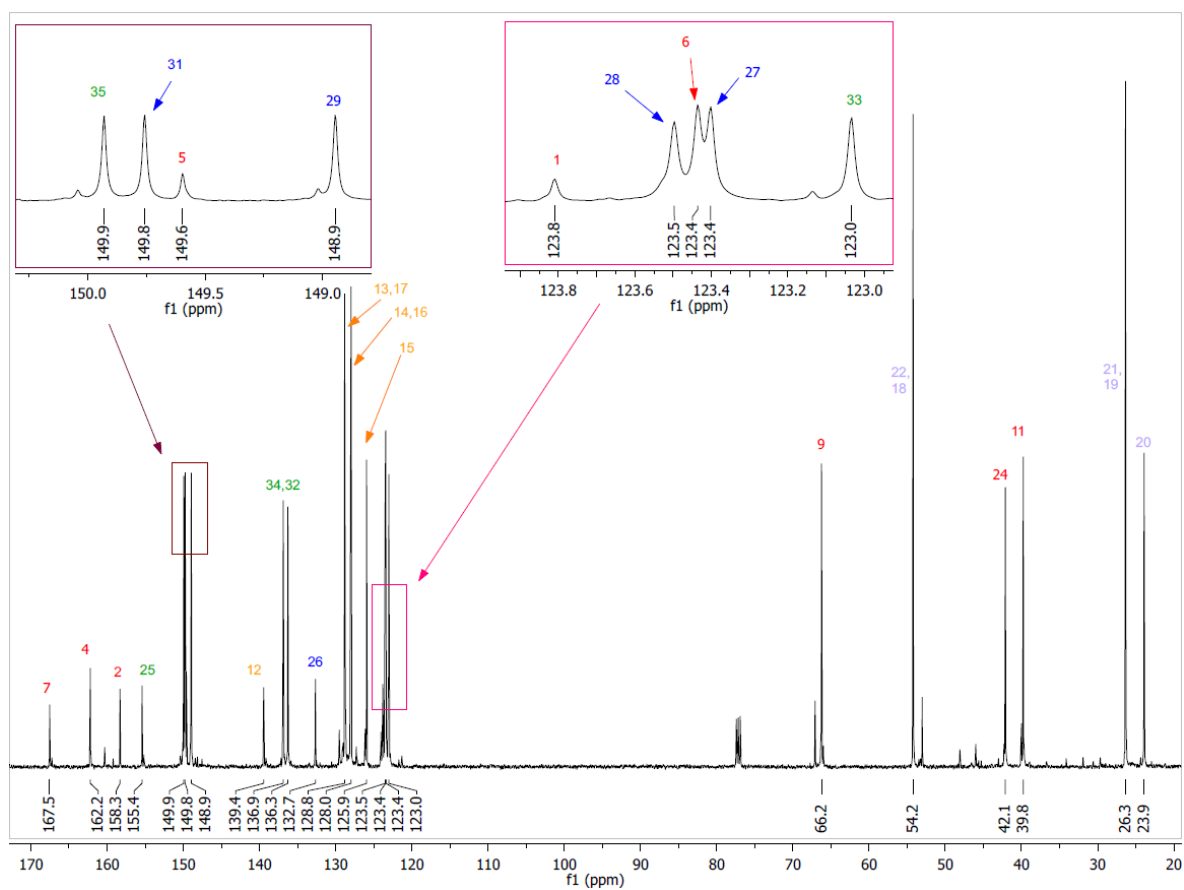

**Figure S13.**  $^{13}\text{C}$  NMR spectrum of the compound **1i**

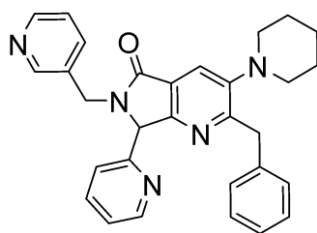

**1i**

**Acquisition Parameter**

|             |          |                      |          |                  |           |
|-------------|----------|----------------------|----------|------------------|-----------|
| Source Type | ESI      | Ion Polarity         | Positive | Set Nebulizer    | 0.5 Bar   |
| Focus       | Active   |                      |          | Set Dry Heater   | 150 °C    |
| Scan Begin  | 50 m/z   | Set Capillary        | 4500 V   | Set Dry Gas      | 4.0 l/min |
| Scan End    | 3000 m/z | Set End Plate Offset | -500 V   | Set Divert Valve | Waste     |

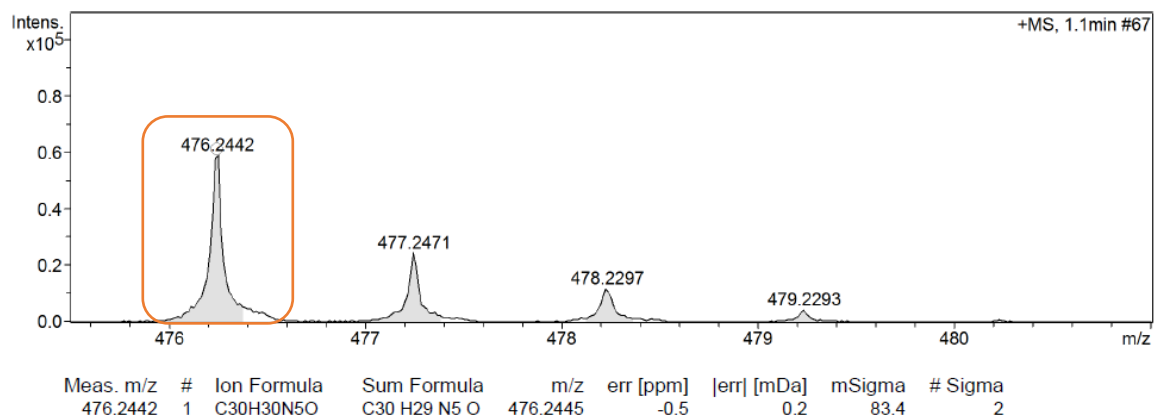

**Figure S14.** HRMS spectrum of the compound **1i**

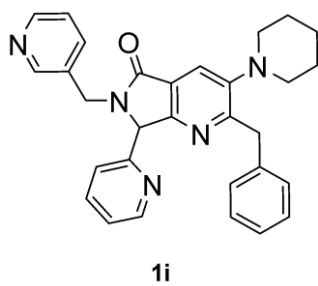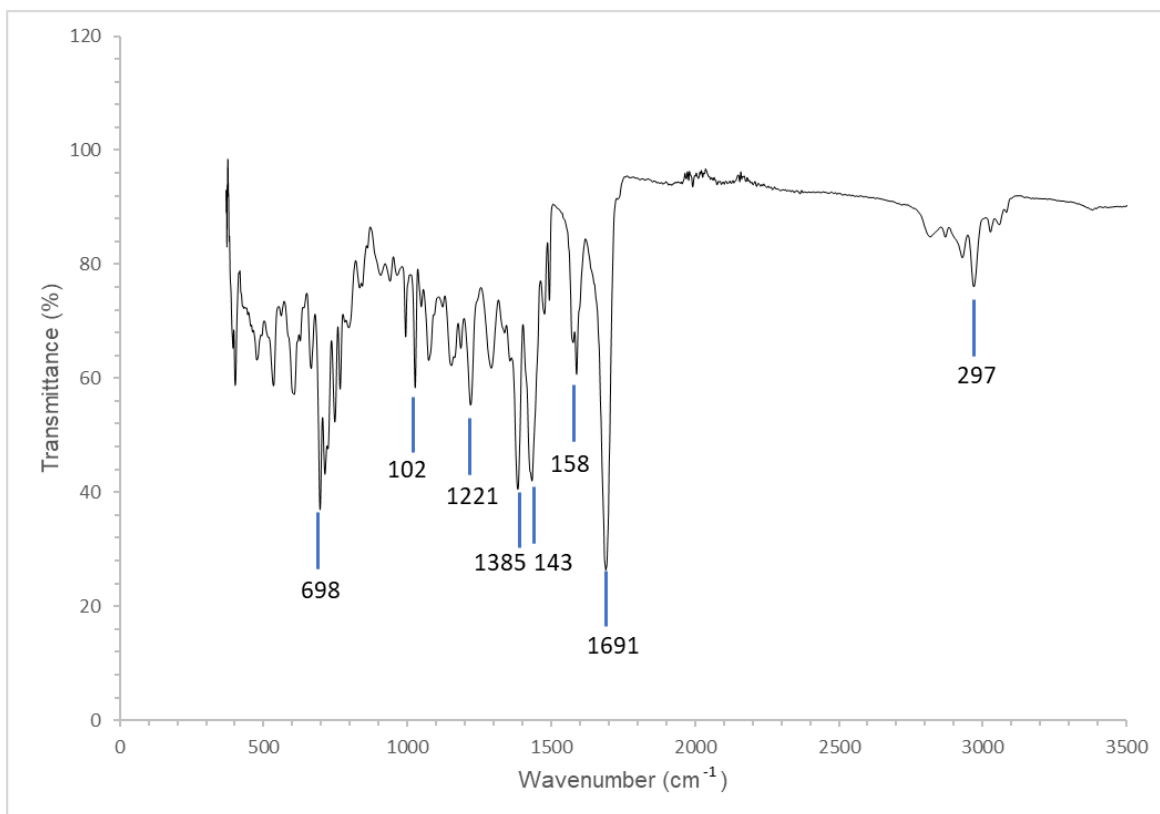

**Figure S15.** FT-IR (ATR) spectrum of the compound **1i**

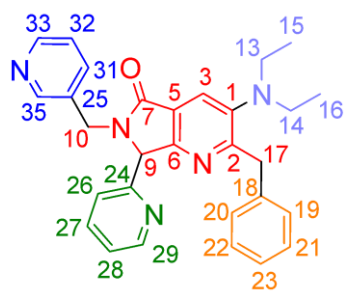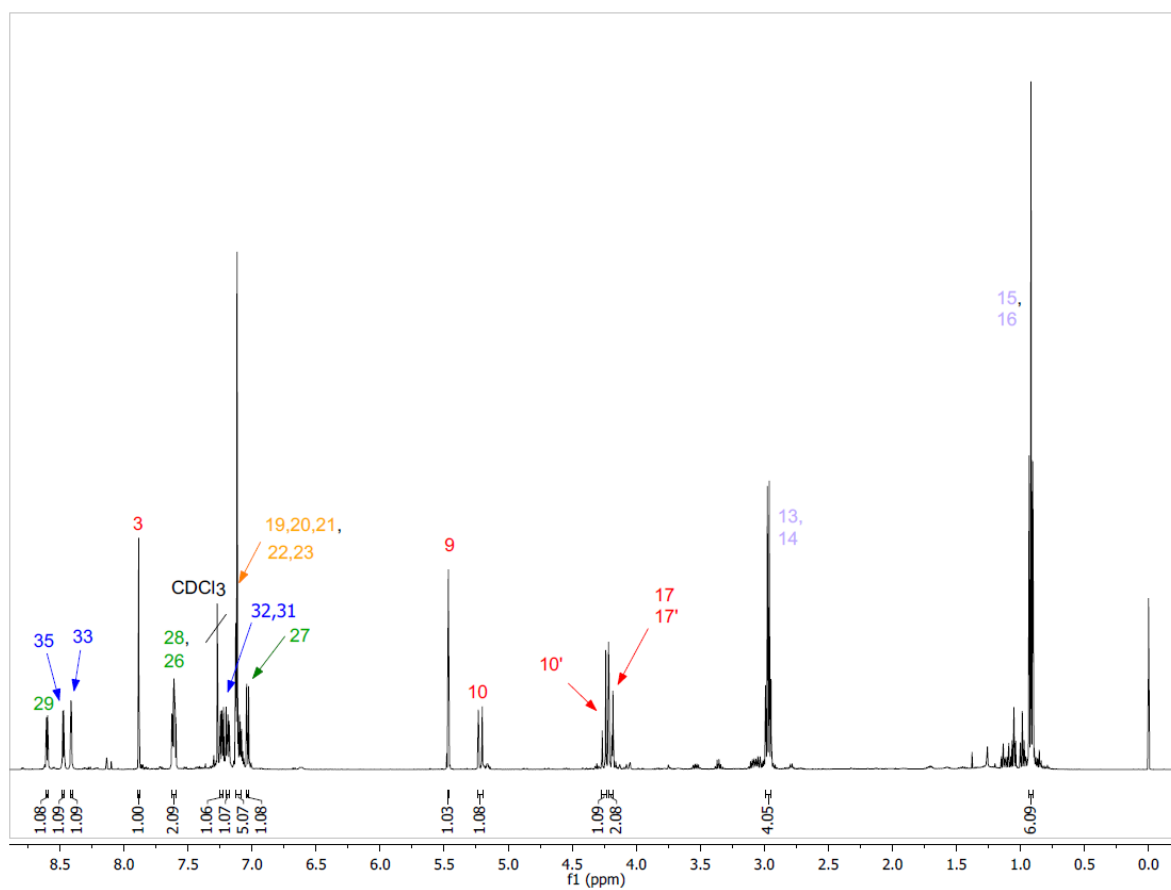

**Figure S16.**  $^1\text{H}$  NMR spectrum of the compound **1j**

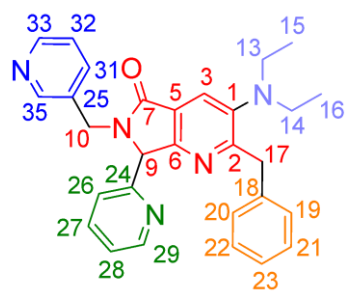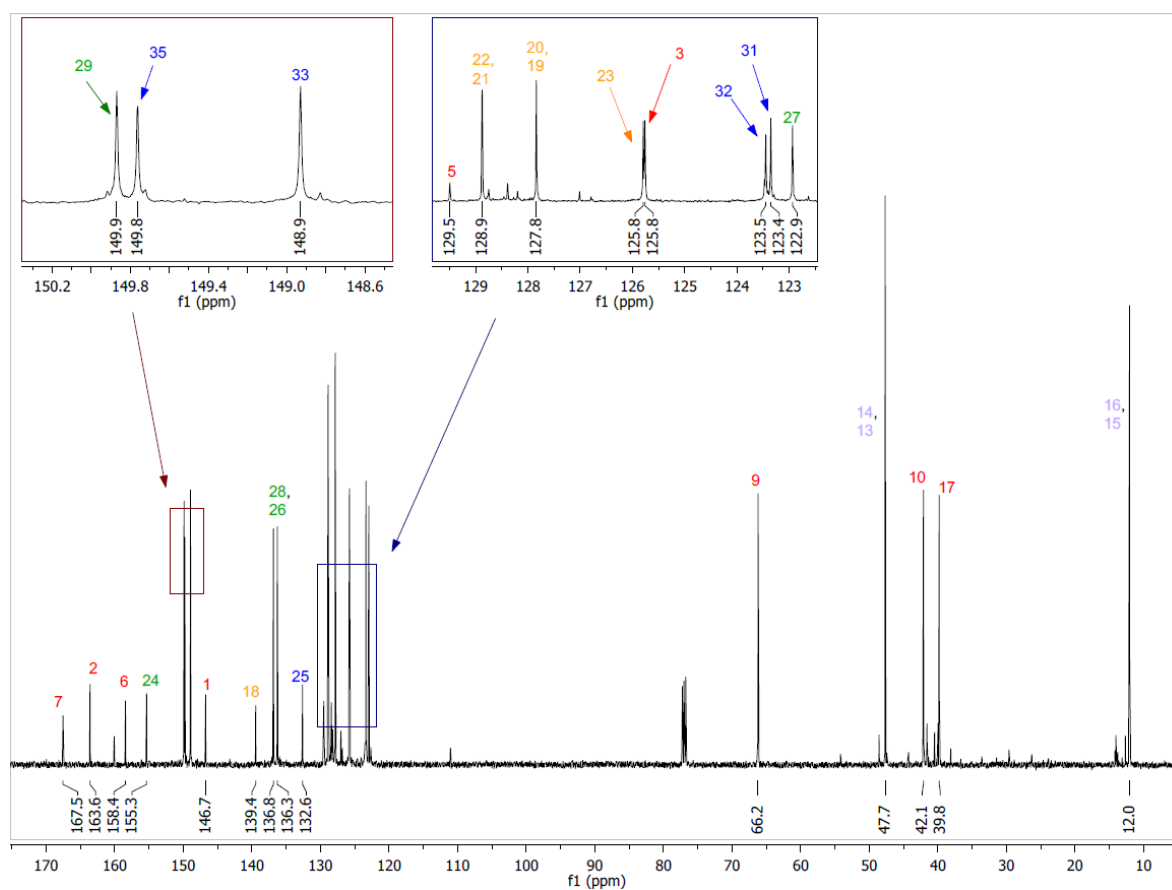

**Figure S17.**  $^{13}\text{C}$  NMR spectrum of the compound **1j**

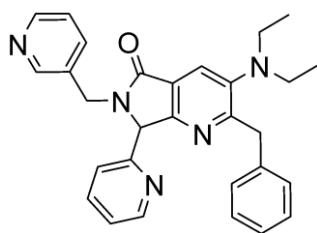

**1j**

**Acquisition Parameter**

|             |          |                      |          |                  |           |
|-------------|----------|----------------------|----------|------------------|-----------|
| Source Type | ESI      | Ion Polarity         | Positive | Set Nebulizer    | 0.5 Bar   |
| Focus       | Active   |                      |          | Set Dry Heater   | 150 °C    |
| Scan Begin  | 50 m/z   | Set Capillary        | 4500 V   | Set Dry Gas      | 4.0 l/min |
| Scan End    | 3000 m/z | Set End Plate Offset | -500 V   | Set Divert Valve | Waste     |

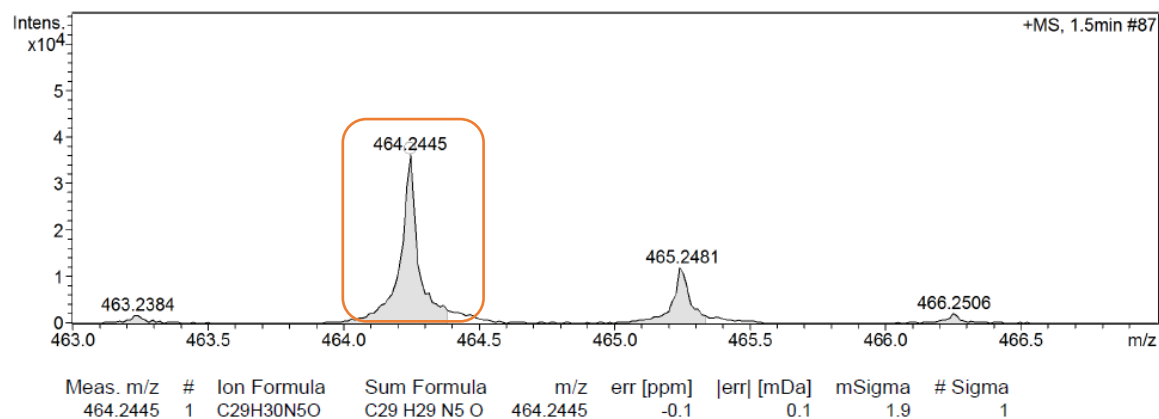

**Figure S18.** HRMS spectrum of the compound **1j**

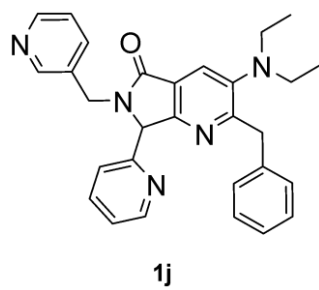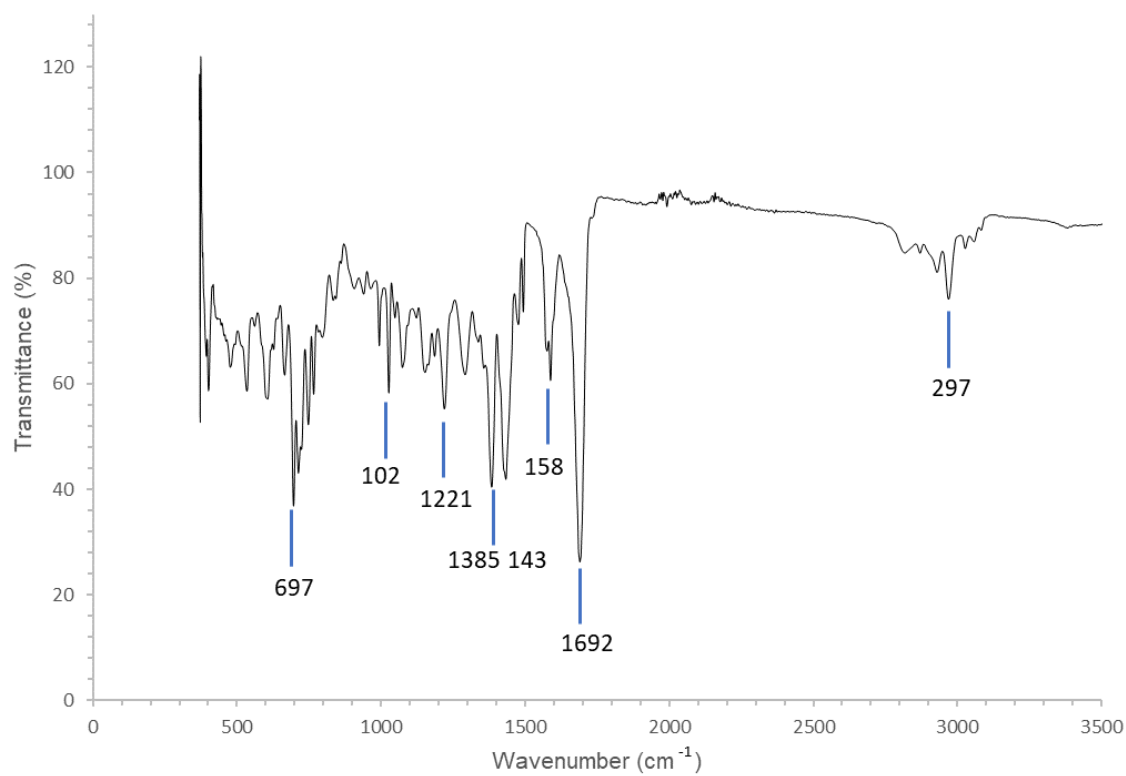

**Figure S19.** FT-IR (ATR) spectrum of the compound **1j**

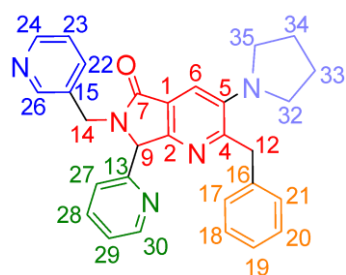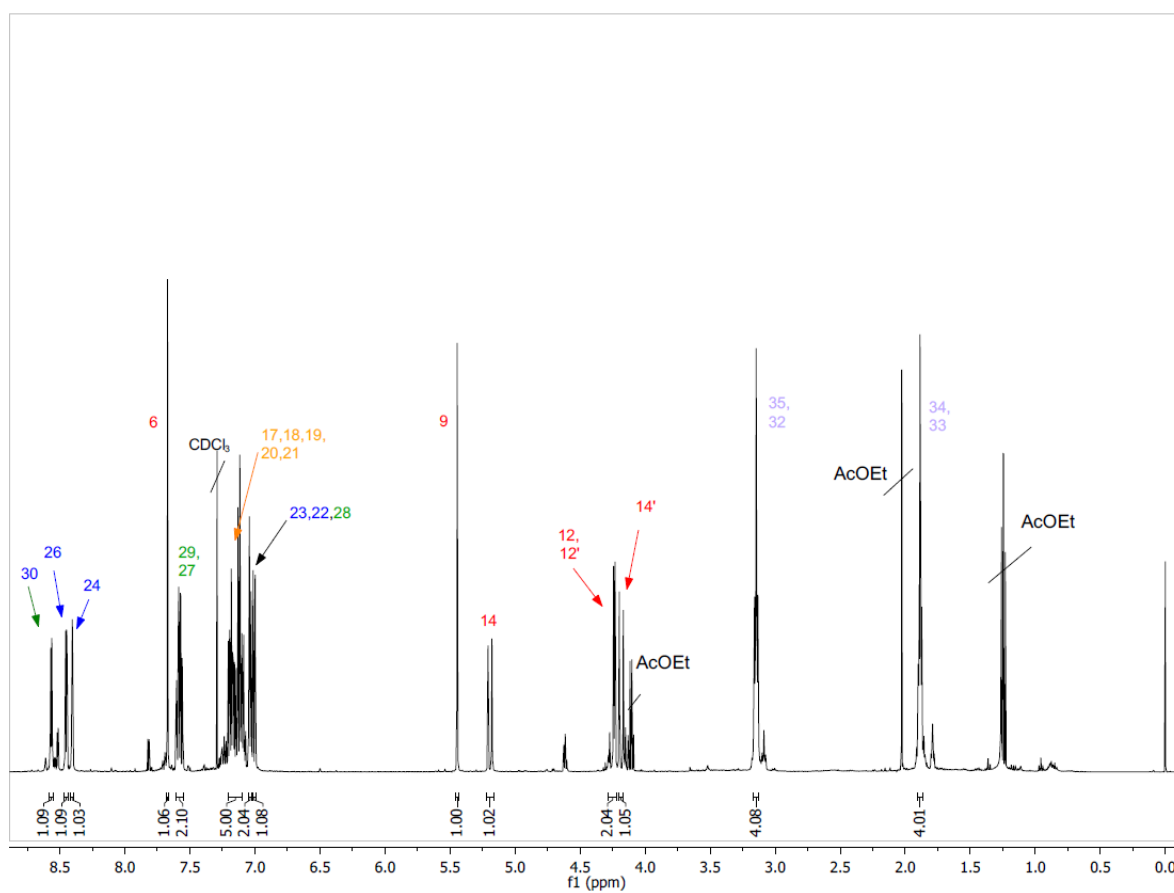

Figure S20.  $^1\text{H}$  NMR spectrum of the compound **1k**



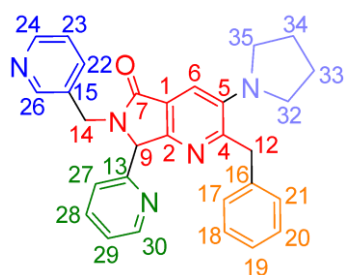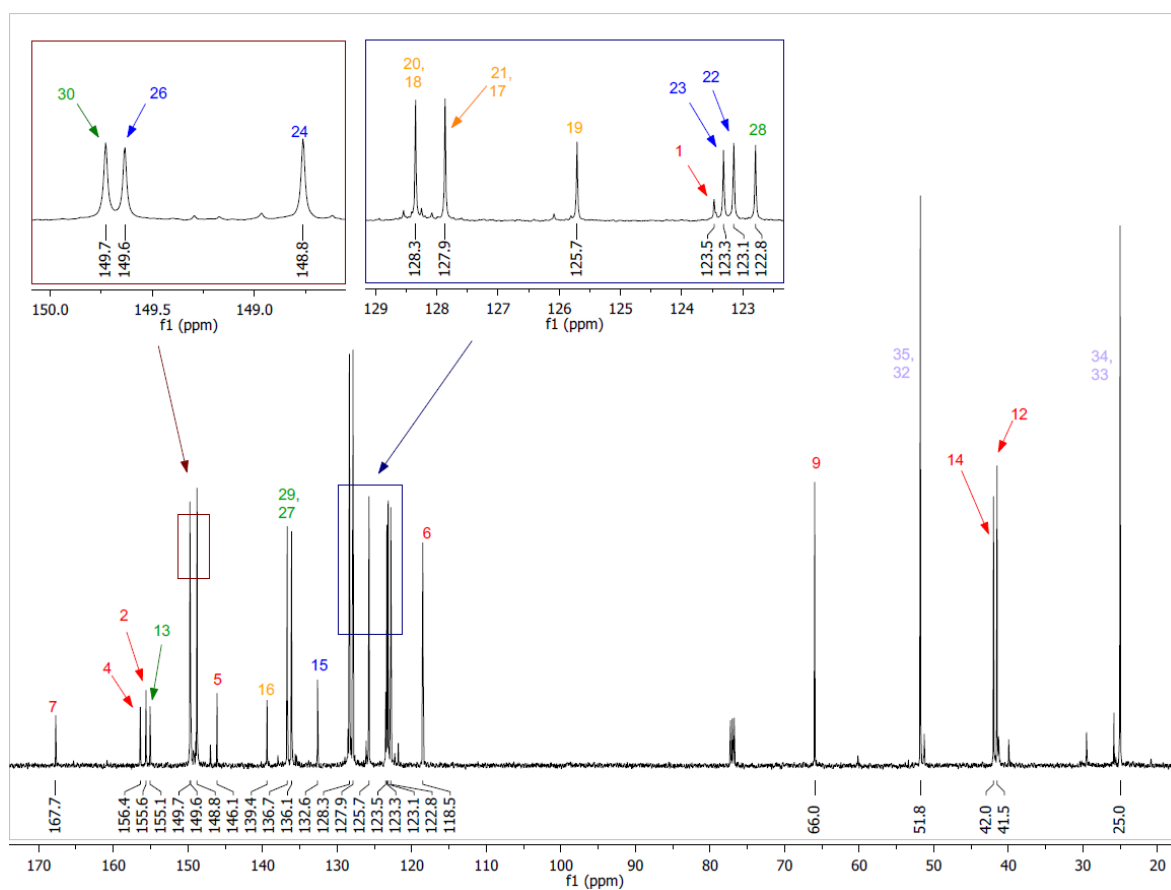

Figure S21.  $^{13}\text{C}$  NMR spectrum of the compound 1k

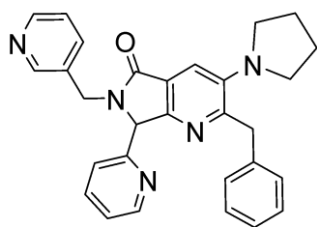

**1k**

**Acquisition Parameter**

|             |          |                      |          |                  |           |
|-------------|----------|----------------------|----------|------------------|-----------|
| Source Type | ESI      | Ion Polarity         | Positive | Set Nebulizer    | 0.5 Bar   |
| Focus       | Active   |                      |          | Set Dry Heater   | 150 °C    |
| Scan Begin  | 50 m/z   | Set Capillary        | 4500 V   | Set Dry Gas      | 4.0 l/min |
| Scan End    | 3000 m/z | Set End Plate Offset | -500 V   | Set Divert Valve | Waste     |

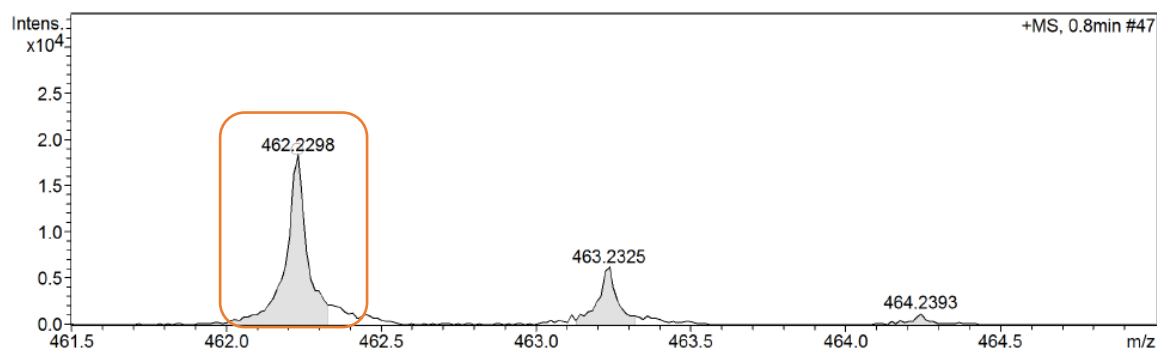

| Meas. m/z | # | Ion Formula                                      | Sum Formula                                      | m/z      | err [ppm] | err [mDa] | mSigma | # | Sigma |
|-----------|---|--------------------------------------------------|--------------------------------------------------|----------|-----------|-----------|--------|---|-------|
| 462.2298  | 1 | C <sub>29</sub> H <sub>28</sub> N <sub>5</sub> O | C <sub>29</sub> H <sub>27</sub> N <sub>5</sub> O | 462.2288 | 2.0       | 0.9       | 6.8    | 1 |       |

**Figure S22.** HRMS spectrum of the compound **1k**

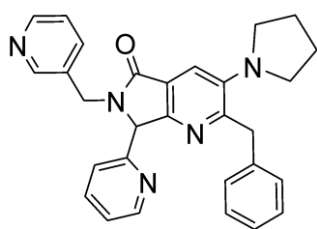

**1k**

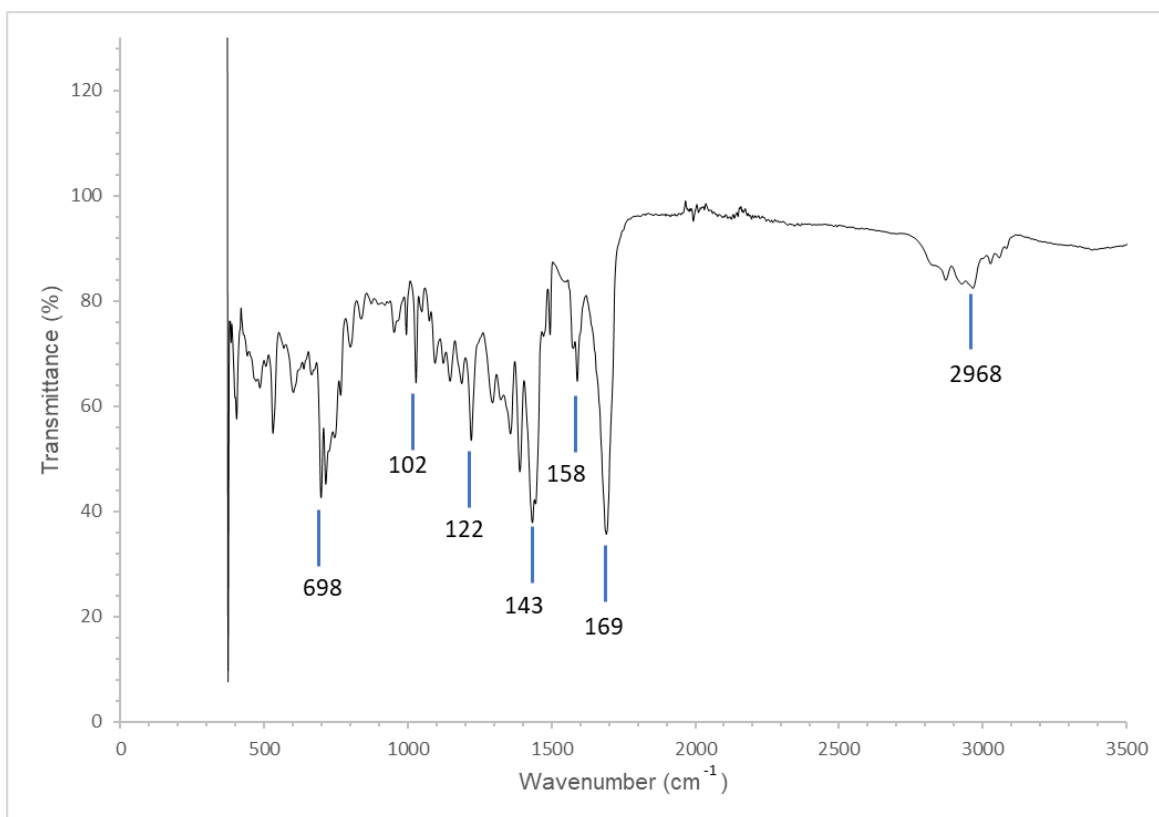

**Figure S23.** FT-IR (ATR) spectrum of the compound **1k**

#### 4 *In silico* studies

**Table S2:** Receptor and Cavity Information. The **Table S2** contains comprehensive information regarding the receptors and their corresponding cavities. The columns of the dataset consist of several key attributes, including names and acronyms of the targets, PDB IDs, hydrophobic and electrostatic representations of the cavity, identified amino acids within the cavity, and dimensions of the docking box, including its matching centers.

| Protein                                        | PDB-ID | Cavity location and representation                                                  |                                                                                      | Cavity conformation                                                                                                                                                                                                                                             | Docking Box                      |                                  |
|------------------------------------------------|--------|-------------------------------------------------------------------------------------|--------------------------------------------------------------------------------------|-----------------------------------------------------------------------------------------------------------------------------------------------------------------------------------------------------------------------------------------------------------------|----------------------------------|----------------------------------|
|                                                |        | Hydrophobic Surface                                                                 | Electrostatic Surface                                                                | Amino Acids                                                                                                                                                                                                                                                     | Size                             | Center                           |
| Dual specificity protein phosphatase 3 (DUSP3) | 3F81   | 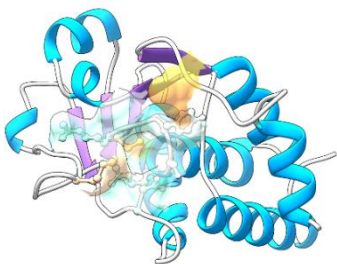   |    | <b>CHAIN A</b><br>LEU25; MET69;<br>ASP92; CYS24;<br>GLU26; GLY27;<br>TYR28; SER29;<br>ARG30; SER31                                                                                                                                                              | X: 20.25<br>Y: 20.00<br>Z: 10.00 | X: 1.63<br>Y: 2.26<br>Z: -3.4    |
| MAP kinase-activated protein kinase 3 (MAPK3)  | 3FHR   |  |   | <b>CHAIN A</b><br>LEU50; GLY51;<br>LEU52; GLY53;<br>VAL58; ALA71;<br>LYS73; VAL98;<br>MET118; GLU119;<br>CYS120; MET121;<br>GLU122; GLY124;<br>GLU170; ASN171;<br>LEU173; LYS177;<br>THR 186; ASP187                                                            | X: 22.30<br>Y: 18.08<br>Z: 25.23 | X: 20.15<br>Y: 3.63<br>Z: 13.75  |
| Orexin receptor type 2 (Ox2R).                 | 6TPN   |  |  | <b>CHAIN A</b><br>CYS107; THR111;<br>VAL114; TRP 20;<br>ILE 130; PRO131;<br>GLN134; THR135;<br>VAL138; GLN187;<br>MET191; CYS210;<br>GLU212; TYR223;<br>HIS224; PHE227;<br>THR231; TYR 232;<br>TYR317; ILE320;<br>SER321; ASN324;<br>HIS350; VAL353;<br>TYR354; | X: 28.13<br>Y: 21.75<br>Z: 21.75 | X: 95.48<br>Y: 225.08<br>Z: 2.25 |

|                                            |      |                                                                                     |                                                                                      |                                                                                                                                                                                                                                                                                |                                  |                                    |
|--------------------------------------------|------|-------------------------------------------------------------------------------------|--------------------------------------------------------------------------------------|--------------------------------------------------------------------------------------------------------------------------------------------------------------------------------------------------------------------------------------------------------------------------------|----------------------------------|------------------------------------|
| Metabotropic glutamate receptor 2 (mGluR2) | 7EPF | 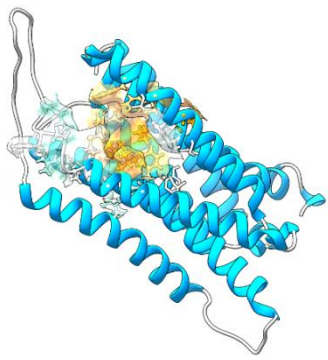   |    | <b>CHAIN A</b><br>PHE623; ARG636<br>LEU 639; GLY640;<br>PHE643; GLN690;<br>HIS723; ARG724;<br>ASP725; SER727;<br>MET728; SER731;<br>LEU732; ASN735;<br>ILE772; TRP773;<br>PHE776; PHE780;<br>MET794; SER797;<br>VAL798; SER801                                                 | X: 20.59<br>Y: 26.05<br>Z: 21.02 | X: 13.83<br>Y: -50.33<br>Z: 41.76  |
| Histamine H3 receptor (H3)                 | 7F61 |    |    | <b>CHAIN A</b><br>ARG27; TYR91;<br>TYR94; VAL95;<br>TRP110; LEU111;<br>ASP114; TYR115;<br>CYS118; CYS188;<br>TYR189; ALA190;<br>PHE193; TYR374;<br>MET378; TYR394;<br>GLU395; PHE398<br>LEU401; TRP402                                                                         | X: 13.77<br>Y: 16.95<br>Z: 9.16  | X: -18.79<br>Y: 51.44<br>Z: 0.81   |
| Ghrelin receptor- (ghrelinR)               | 7NA8 |   |   | <b>CHAIN E<br/>[AUTH R]</b><br>ASP99;ARG102;<br>LEU103;GLN105;<br>PHE119;GLN120;<br>SER123;GLU124;<br>TYR128;ILE178;<br>LEU181;VAL182;<br>PRO200;LEU210;<br>MET213;VAL214;<br>SER217;PHE279;<br>ARG283;PHE286;<br>SER287;SER301;<br>GLN302;ASN305;<br>LEU306;PHE309;<br>PHE312 | X: 27.52<br>Y: 27.24<br>Z: 25.14 | X: 125.52<br>Y: 137.06<br>Z: 95.38 |
| GTPase KRas (KRAS)                         | 7SCX |  |  | <b>CHAIN A</b><br>ALA11;VAL12;<br>GLY13;VAL14;<br>GLY15;LYS16;<br>SER17;ALA18;<br>PHE28;VAL29;<br>ASP30;GLU31;<br>ASP33;PRO34;<br>THR35;THR58;<br>ALA59;GLY60;<br>GLN61;ASN116;<br>LYS117;SER118;<br>ASP119;LEU120;                                                            | X: 33.50<br>Y: 27.19<br>Z: 25.18 | X: 13.52<br>Y: -8.64<br>Z: 25.47   |



|                                     |      |                                                                                     |                                                                                      |                                                                                                                                                                                                                                                                                                                                                           |                                  |                                   |
|-------------------------------------|------|-------------------------------------------------------------------------------------|--------------------------------------------------------------------------------------|-----------------------------------------------------------------------------------------------------------------------------------------------------------------------------------------------------------------------------------------------------------------------------------------------------------------------------------------------------------|----------------------------------|-----------------------------------|
|                                     |      |                                                                                     |                                                                                      | SER145;ALA146;LY<br>S147                                                                                                                                                                                                                                                                                                                                  |                                  |                                   |
| Serotonin 6<br>receptor<br>(5-HT6)  | 7XTB | 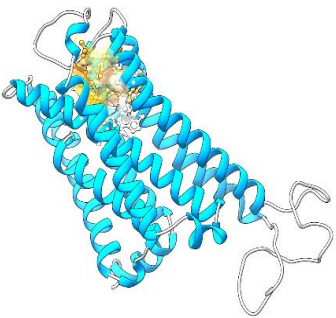   |    | <b>CHAIN E</b><br>ASP106;VAL107;<br>CYS110;SER111;<br>LEU182;LEU183;<br>PHE188;VAL189;<br>ALA192;SER193;<br>THR196;TRP281;<br>PHE284;PHE285;<br>ASN288;THR306;<br>TYR310                                                                                                                                                                                  | X: 13.77<br>Y: 16.95<br>Z: 9.16  | X: 85.41<br>Y: 109.95<br>Z: 82.19 |
| Cathepsin L<br>(CTSL)               | 8C77 |    |    | <b>CHAIN A</b><br>GLN19;CYS22;<br>GLY23;SER24;<br>CYS25;TRP26;<br>GLU63;ASN66;<br>GLY67;GLY68;<br>LEU69;MET70;<br>ALA135;MET161;<br>ASP162;HIS163;<br>GLY164;ALA214                                                                                                                                                                                       | X: 21.56<br>Y: 14.36<br>Z: 19.11 | X: 16.53<br>Y: -21.60<br>Z: -0.97 |
| Cytochrome<br>P450 2C9<br>(CYP2C9), | 1R9O |  |  | <b>CHAIN A</b><br>LEU87, ARG97,<br>ILE112, VAL113,<br>TRP120, ARG124,<br>LEU131, ILE178,<br>ASP293, LEU294,<br>ALA297, GLY298,<br>THR301, THR302,<br>THR305, GLN356,<br>LEU361, LEU362,<br>SER365, LEU366,<br>HIS368, LEU391,<br>PRO427, PHE428,<br>SER429, ALA430,<br>ARG433, ILE434,<br>CYS435, VAL436,<br>GLY437, LEU440,<br>ALA441, GLU444,<br>LEU445 | X: 20.47<br>Y: 18.83<br>Z: 17.69 | X: 8.07<br>Y: 35.40<br>Z: -3.03   |

|                                                           |      |                                                                                     |                                                                                      |                                                                                                                                                                                                                |                                  |                                   |
|-----------------------------------------------------------|------|-------------------------------------------------------------------------------------|--------------------------------------------------------------------------------------|----------------------------------------------------------------------------------------------------------------------------------------------------------------------------------------------------------------|----------------------------------|-----------------------------------|
| Cathepsin S<br>(CTSS)                                     | 2FRA | 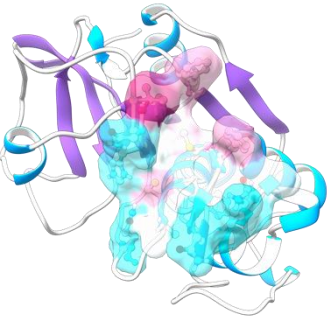   |    | <b>CHAIN A</b><br>GLN19, GLY23,<br>ALA24, CYS25,<br>TRP26, GLY59,<br>ASN60, LYS61,<br>ASN64, GLY65,<br>GLY66, PHE67,<br>MET68, VAL132,<br>GLY133, VAL157,<br>ASN158, HIS159,<br>GLY160, PHE205                 | X: 19.66<br>Y: 18.21<br>Z: 15.66 | X: 51.26<br>Y: 21.23<br>Z: 125.59 |
| Cyclin-<br>dependent<br>kinase<br>2/cyclin A<br>(Cdk2/CA) | 2R3F |    |    | <b>CHAIN A</b><br>ILE10, GLY11,<br>GLU12, GLY13,<br>VAL18, ALA31,<br>LYS33, VAL64,<br>PHE80, GLU81,<br>PHE82, LEU83,<br>HIS84, GLN85,<br>ASP86, LYS89,<br>GLN131, ASN132,<br>LEU134, ALA144,<br>ASP145         | X: 19.64<br>Y: 22.55<br>Z: 16.82 | X: 1.53<br>Y: 28.87<br>Z: 9.785   |
| Cyclin-<br>dependent<br>kinase 4<br>CDK4                  | 2W9Z |  |  | <b>CHAIN A</b><br>GLU11, ILE12,<br>GLY13, GLY18,<br>VAL20, VAL32,<br>LEU34, VAL57,<br>VAL72, PHE93,<br>GLU94, HIS95,<br>VAL96, ASP97,<br>GLN98, ASP99,<br>THR102, GLU144,<br>ASN145, LEU147,<br>ALA157, ASP158 | X: 18.10<br>Y: 17.93<br>Z: 22.78 | X: 20.08<br>Y: 25.65<br>Z: 11.26  |
| Troponin,<br>cardiac<br>muscle<br>(cTn)                   | 4Y99 |  |  | <b>CHAIN A</b><br>LEU41, VAL44,<br>MET45, LEU48,<br>GLN50, GLU56,<br>MET60, PHE77,<br>MET80, MET81,<br>SER84                                                                                                   | X: 17.03<br>Y: 14.93<br>Z: 20.53 | X: 72.23<br>Y: 92.45<br>Z: 25.68  |

|                                                   |      |                                                                                     |                                                                                      |                                                                                                                                                                                                                  |                                  |                                    |
|---------------------------------------------------|------|-------------------------------------------------------------------------------------|--------------------------------------------------------------------------------------|------------------------------------------------------------------------------------------------------------------------------------------------------------------------------------------------------------------|----------------------------------|------------------------------------|
| Mitogen-activated protein kinase kinase 8 (MAPK8) | 5IU2 | 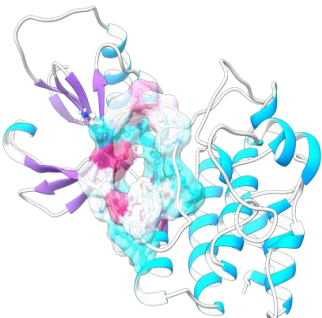   |    | <b>CHAIN A</b><br>TRP132, LEU134, TYR136, PRO145, ALA148, PHE149, GLY150, LYS151, VAL152, ALA165, LYS167, MET207, GLU208, ALA209, GLY210, GLY213, SER214, GLU217, LYS255, SER257, ASN258, VAL260, VAL269, ASP270 | X: 29.78<br>Y: 25.70<br>Z: 22.57 | X: -43.77<br>Y: 1.45<br>Z: -11.26  |
| Serine/threonine-protein kinase AKT (AKT1)        | 5KCV |   |   | <b>CHAIN A</b><br>ASN53, ASN54, GLN79, TRP80, THR82, ILE84, SER205, LEU210, THR211, LEU264, LYS268, VAL270, VAL271, TYR272, ARG273, ASP274, ILE290, THR291, ASP292, GLY294                                       | X: 23.98<br>Y: 19.84<br>Z: 23.83 | X: -7.90<br>Y: -0.002<br>Z: -16.31 |
| Insulin-degrading enzyme (IDE)                    | 6EDS |  |  | <b>CHAIN A</b><br>ALA198, LEU201, PHE202, LEU204, GLU205, THR208, TYR302, ILE304, TYR314, THR316, VAL360, GLY361, GLY362, GLN363, LYS364, ILE374, ASN376, ARG477, VAL478, ALA479                                 | X: 24.96<br>Y: 24.78<br>Z: 28.49 | X: 97.38<br>Y: -68.43<br>Z: -38.46 |
| MAP kinase p38 alpha (p38α)                       | 6SFI |  |  | <b>CHAIN A</b><br>VAL30, TYR35, VAL38, ALA51, LYS53, GLU71, LEU74, LEU75, MET78, VAL83, ILE84, LEU104, THR106, HIS107, LEU108, MET109, GLY110, ALA111, ASP112, ILE141, ILE146, HIS148, ALA157, ILE166,           | X: 18.98<br>Y: 20.78<br>Z: 18.22 | X: 53.75<br>Y: 67.75<br>Z: 15.71   |



|                                                         |      |                                                                                   |                                                                                    |                                                                                                                                                                     |                                  |                                    |
|---------------------------------------------------------|------|-----------------------------------------------------------------------------------|------------------------------------------------------------------------------------|---------------------------------------------------------------------------------------------------------------------------------------------------------------------|----------------------------------|------------------------------------|
|                                                         |      |                                                                                   |                                                                                    | LEU167, ASP168,<br>PHE169, GLY170,<br>LEU171, ALA172                                                                                                                |                                  |                                    |
| Cyclin-<br>dependent<br>kinase<br>2/cyclin E<br>Cdk2/CE | 7E34 | 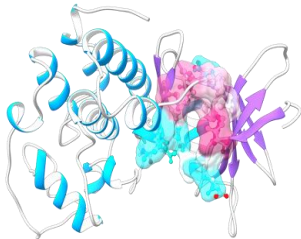 |  | <b>CHAIN A</b><br>ILE10, GLY11,<br>GLU12, GLY13,<br>VAL18, ALA31,<br>VAL64, PHE80,<br>GLU81, PHE82,<br>LEU83, GLN131,<br>ASN132, LEU134,<br>ALA144, ASP145          | X: 13.91<br>Y: 17.85<br>Z: 18.32 | X: -1.56<br>Y: -39.81<br>Z: 14.57  |
| Cytochrome<br>P450 3A4<br>CYP3A4                        | 8EXB |  |  | <b>CHAIN A</b><br>PHE57, ARG105,<br>ARG106, PHE108,<br>MET114, SER119,<br>PHE241, ILE30,<br>PHE301, ALA305,<br>GLU308, THR309,<br>ALA370, MET371,<br>ARG372, GLU374 | X: 22.06<br>Y: 26.52<br>Z: 30.24 | X: -10.91<br>Y: -32.91<br>Z: -7.17 |

**Table S3.** Multiligand and Multitarget Docking Summary of **1a-k** with 20 Target Proteins. This table provides a summary of multiligand and multitarget docking results for compounds **1a-k** with 20 target proteins. Each ligand is color-coded, and within each ligand, each row corresponds to a calculated cluster.

| Protein | ID PDB | Ligand    | Cluster Percentage | RMSD (Å) |   |       | Energy (Kcal/mol) |   |       |
|---------|--------|-----------|--------------------|----------|---|-------|-------------------|---|-------|
| DUSP3   | 3F81   | <b>1a</b> | 31.67%             | 1.015    | ± | 0.015 | -6.840            | ± | 0.058 |
|         |        |           | 26.67%             | 8.144    | ± | 0.005 | -5.245            | ± | 0.135 |
|         |        | <b>1b</b> | 33.33%             | 1.314    | ± | 0.022 | -5.905            | ± | 0.127 |
|         |        |           | 33.33%             | 4.761    | ± | 0.018 | -6.114            | ± | 0.064 |
|         |        |           | 33.33%             | 0.069    | ± | 0.049 | -8.629            | ± | 0.039 |
|         |        | <b>1c</b> | 33.33%             | 1.221    | ± | 0.028 | -6.312            | ± | 0.084 |
|         |        |           | 33.33%             | 4.773    | ± | 0.041 | -6.314            | ± | 0.062 |
|         |        |           | 31.67%             | 0.098    | ± | 0.064 | -8.317            | ± | 0.034 |
|         |        | <b>1d</b> | 48.33%             | 7.311    | ± | 0.027 | -6.746            | ± | 0.193 |
|         |        |           | 41.67%             | 7.801    | ± | 0.010 | -5.793            | ± | 0.309 |
|         |        | <b>1e</b> | 35.00%             | 0.925    | ± | 0.080 | -6.833            | ± | 0.500 |
|         |        |           | 30.00%             | 7.441    | ± | 0.100 | -6.281            | ± | 0.056 |
|         |        | <b>1f</b> | 65.00%             | 0.185    | ± | 0.105 | -6.897            | ± | 0.122 |
|         |        |           | 33.33%             | 3.712    | ± | 0.020 | -5.125            | ± | 0.088 |
|         |        | <b>1g</b> | 35.00%             | 8.339    | ± | 0.023 | -6.003            | ± | 0.402 |
|         |        |           | 33.33%             | 0.115    | ± | 0.048 | -7.263            | ± | 0.021 |
|         |        |           | 26.67%             | 6.210    | ± | 0.027 | -6.419            | ± | 0.027 |
|         |        | <b>1h</b> | 23.33%             | 0.171    | ± | 0.090 | -7.850            | ± | 0.040 |
|         |        |           | 33.33%             | 1.258    | ± | 0.019 | -5.488            | ± | 0.157 |
|         |        |           | 30.00%             | 7.326    | ± | 0.059 | -6.967            | ± | 0.114 |
|         |        | <b>1i</b> | 33.33%             | 5.194    | ± | 0.012 | -6.238            | ± | 0.201 |
|         |        |           | 31.67%             | 7.801    | ± | 0.050 | -7.121            | ± | 0.048 |
|         |        | <b>1j</b> | 31.67%             | 0.317    | ± | 0.084 | -7.103            | ± | 0.056 |
|         |        |           | 26.67%             | 8.204    | ± | 0.003 | -6.056            | ± | 0.009 |
|         |        | <b>1k</b> | 41.67%             | 3.378    | ± | 0.034 | -7.099            | ± | 0.181 |
|         |        |           | 35.00%             | 7.816    | ± | 0.067 | -3.873            | ± | 2.879 |
| MAPK3   | 3FHR   | <b>1a</b> | 33.33%             | 7.400    | ± | 0.006 | -4.055            | ± | 0.051 |
|         |        |           | 30.00%             | 4.589    | ± | 0.100 | -7.170            | ± | 0.100 |
|         |        | <b>1b</b> | 33.33%             | 8.163    | ± | 0.005 | -5.474            | ± | 0.177 |
|         |        |           | 33.33%             | 1.819    | ± | 0.059 | -6.827            | ± | 0.030 |
|         |        |           | 31.67%             | 0.111    | ± | 0.016 | -7.114            | ± | 0.025 |
|         |        | <b>1c</b> | 33.33%             | 1.819    | ± | 0.059 | -6.430            | ± | 0.668 |

|       |      |           |         |       |   |       |        |   |       |
|-------|------|-----------|---------|-------|---|-------|--------|---|-------|
|       |      |           | 33.33%  | 8.163 | ± | 0.005 | -6.405 | ± | 0.659 |
|       |      |           | 33.33%  | 0.111 | ± | 0.016 | -6.319 | ± | 0.685 |
|       |      | <b>1d</b> | 30.00%  | 7.178 | ± | 0.035 | -6.117 | ± | 0.203 |
|       |      |           | 28.33%  | 8.602 | ± | 0.041 | -4.106 | ± | 0.359 |
|       |      | <b>1e</b> | 33.33%  | 2.112 | ± | 0.039 | -7.118 | ± | 0.025 |
|       |      |           | 33.33%  | 7.208 | ± | 0.012 | -2.807 | ± | 0.091 |
|       |      |           | 28.33%  | 0.078 | ± | 0.077 | -7.149 | ± | 0.012 |
|       |      | <b>1f</b> | 33.33%  | 1.865 | ± | 0.011 | -5.933 | ± | 0.008 |
|       |      |           | 33.33%  | 0.062 | ± | 0.018 | -6.943 | ± | 0.016 |
|       |      | <b>1g</b> | 31.67%  | 3.346 | ± | 0.010 | -5.593 | ± | 0.083 |
|       |      |           | 31.67%  | 7.317 | ± | 0.012 | -6.435 | ± | 0.014 |
|       |      | <b>1h</b> | 28.33%  | 8.012 | ± | 0.004 | -6.232 | ± | 0.042 |
|       |      |           | 33.33%  | 0.066 | ± | 0.051 | -7.222 | ± | 0.017 |
|       |      |           | 33.33%  | 1.843 | ± | 1.163 | -6.698 | ± | 0.348 |
|       |      | <b>1i</b> | 33.33%  | 1.315 | ± | 0.006 | -7.200 | ± | 0.044 |
|       |      |           | 33.33%  | 0.088 | ± | 0.040 | -8.546 | ± | 0.073 |
|       |      | <b>1j</b> | 40.00%  | 8.413 | ± | 0.022 | -6.747 | ± | 1.175 |
|       |      |           | 33.33%  | 0.178 | ± | 0.024 | -7.291 | ± | 0.043 |
|       |      | <b>1k</b> | 33.33%  | 6.141 | ± | 0.008 | -6.347 | ± | 0.169 |
|       |      |           | 33.33%  | 0.045 | ± | 0.017 | -7.935 | ± | 0.018 |
|       |      |           | 31.67%  | 8.497 | ± | 0.002 | -7.880 | ± | 0.022 |
| 5-HT6 | 7XTB | <b>1a</b> | 33.33%  | 0.037 | ± | 0.013 | -0.725 | ± | 0.022 |
|       |      |           | 33.33%  | 8.492 | ± | 0.001 | 0.064  | ± | 0.033 |
|       |      |           | 33.33%  | 8.578 | ± | 0.014 | 3.428  | ± | 0.128 |
|       |      | <b>1b</b> | 66.67%  | 0.104 | ± | 0.075 | -2.453 | ± | 0.219 |
|       |      |           | 33.33%  | 0.906 | ± | 0.001 | -0.303 | ± | 0.015 |
|       |      | <b>1c</b> | 66.67%  | 0.220 | ± | 0.183 | -2.593 | ± | 0.664 |
|       |      |           | 33.33%  | 0.736 | ± | 0.003 | -1.319 | ± | 0.056 |
|       |      | <b>1e</b> | 66.67%  | 0.123 | ± | 0.092 | 0.093  | ± | 0.346 |
|       |      |           | 33.33%  | 1.688 | ± | 0.005 | 0.348  | ± | 0.066 |
|       |      | <b>1g</b> | 66.67%  | 0.313 | ± | 0.296 | -2.302 | ± | 0.256 |
|       |      |           | 33.33%  | 0.852 | ± | 0.003 | -1.632 | ± | 0.094 |
| H3    | 7F61 | <b>1a</b> | 66.67%  | 0.096 | ± | 3.930 | -1.034 | ± | 0.117 |
|       |      | <b>1b</b> | 100.00% | 0.156 | ± | 0.090 | -1.672 | ± | 0.154 |
|       |      | <b>1c</b> | 63.33%  | 0.208 | ± | 0.160 | -3.354 | ± | 0.512 |
|       |      |           | 33.33%  | 4.235 | ± | 0.002 | -0.148 | ± | 0.046 |
|       |      | <b>1e</b> | 66.67%  | 0.104 | ± | 0.068 | -1.930 | ± | 0.112 |

| Protein | ID PDB | Ligand | Cluster Percentage | RMSD (Å) |   |       | Energy (Kcal/mol) |   |       |
|---------|--------|--------|--------------------|----------|---|-------|-------------------|---|-------|
| KRAS    | 7SCX   | 1a     | 33.33%             | 0.066    | ± | 0.023 | -9.083            | ± | 0.026 |
|         |        |        | 33.33%             | 7.906    | ± | 0.004 | -8.106            | ± | 0.012 |
|         |        |        | 33.33%             | 8.869    | ± | 0.006 | -6.680            | ± | 0.080 |
|         |        | 1b     | 33.33%             | 0.060    | ± | 0.028 | -9.329            | ± | 0.020 |
|         |        |        | 33.33%             | 5.741    | ± | 1.763 | -7.370            | ± | 0.998 |
|         |        | 1c     | 33.33%             | 0.109    | ± | 0.049 | -9.106            | ± | 0.060 |
|         |        |        | 33.33%             | 7.738    | ± | 0.008 | -6.763            | ± | 0.077 |
|         |        | 1d     | 31.67%             | 0.076    | ± | 0.027 | -8.734            | ± | 0.019 |
|         |        |        | 33.33%             | 2.600    | ± | 0.034 | -8.069            | ± | 0.010 |
|         |        | 1e     | 33.33%             | 0.084    | ± | 0.030 | -9.542            | ± | 0.017 |
|         |        |        | 33.33%             | 6.789    | ± | 0.004 | -7.880            | ± | 0.015 |
|         |        | 1f     | 33.33%             | 0.037    | ± | 0.019 | -8.201            | ± | 0.007 |
|         |        |        | 33.33%             | 1.367    | ± | 0.007 | -8.159            | ± | 0.009 |
|         |        |        | 33.33%             | 9.258    | ± | 0.053 | -7.275            | ± | 0.201 |
|         |        | 1g     | 33.33%             | 0.113    | ± | 0.051 | -8.883            | ± | 0.023 |
|         |        |        | 33.33%             | 7.084    | ± | 0.075 | -3.451            | ± | 0.658 |
|         |        | 1h     | 33.33%             | 0.217    | ± | 0.119 | -8.959            | ± | 0.034 |
|         |        |        | 26.67%             | 1.229    | ± | 0.112 | -8.412            | ± | 0.062 |
|         |        |        | 25.00%             | 5.704    | ± | 0.085 | -4.936            | ± | 1.538 |
|         |        | 1i     | 33.33%             | 0.056    | ± | 0.025 | -9.698            | ± | 0.015 |
|         |        |        | 33.33%             | 8.161    | ± | 0.007 | -7.850            | ± | 0.013 |
|         |        | 1j     | 33.33%             | 0.139    | ± | 0.043 | -8.137            | ± | 0.022 |
|         |        |        | 33.33%             | 1.869    | ± | 0.016 | -7.915            | ± | 0.004 |
|         |        |        | 33.33%             | 7.855    | ± | 0.027 | -5.002            | ± | 0.220 |
|         |        | 1k     | 33.33%             | 0.066    | ± | 0.024 | -8.754            | ± | 0.011 |
|         |        |        | 33.33%             | 0.846    | ± | 0.002 | -8.643            | ± | 0.005 |
|         |        |        | 31.67%             | 7.335    | ± | 0.508 | -5.232            | ± | 0.612 |
| mGluR2  | 7EPF   | 1a     | 61.67%             | 0.257    | ± | 0.194 | -9.907            | ± | 0.089 |
|         |        |        | 33.33%             | 0.959    | ± | 0.009 | -9.078            | ± | 0.040 |
|         |        | 1b     | 66.67%             | 0.181    | ± | 0.137 | -9.616            | ± | 0.022 |
|         |        |        | 33.33%             | 3.618    | ± | 0.014 | -8.078            | ± | 0.060 |
|         |        | 1c     | 66.67%             | 0.190    | ± | 0.156 | -9.772            | ± | 0.073 |
|         |        |        | 33.33%             | 5.840    | ± | 0.002 | -6.951            | ± | 0.032 |
|         |        | 1d     | 33.33%             | 0.750    | ± | 0.008 | -9.769            | ± | 0.021 |
|         |        |        | 33.33%             | 1.895    | ± | 0.003 | -9.073            | ± | 0.072 |
|         |        |        | 33.33%             | 0.075    | ± | 0.036 | -9.912            | ± | 0.031 |
|         |        | 1e     | 66.67%             | 4.372    | ± | 0.093 | -9.632            | ± | 0.073 |

|         |      |           |        |        |   |       |         |   |       |
|---------|------|-----------|--------|--------|---|-------|---------|---|-------|
|         |      |           | 33.33% | 0.028  | ± | 0.011 | -9.148  | ± | 0.065 |
|         |      | <b>1f</b> | 66.67% | 0.252  | ± | 0.187 | -9.854  | ± | 0.113 |
|         |      |           | 33.33% | 6.641  | ± | 0.003 | -7.667  | ± | 0.048 |
|         |      | <b>1g</b> | 33.33% | 2.093  | ± | 0.003 | -9.249  | ± | 0.005 |
|         |      |           | 33.33% | 0.045  | ± | 0.017 | -9.496  | ± | 0.015 |
|         |      |           | 33.33% | 7.809  | ± | 0.016 | -8.116  | ± | 0.262 |
|         |      | <b>1h</b> | 63.33% | 0.154  | ± | 0.095 | -10.911 | ± | 0.144 |
|         |      |           | 33.33% | 1.576  | ± | 0.005 | -7.773  | ± | 0.066 |
|         |      | <b>1i</b> | 33.33% | 0.048  | ± | 0.013 | -11.007 | ± | 0.013 |
|         |      |           | 33.33% | 0.941  | ± | 0.003 | -10.630 | ± | 0.006 |
|         |      |           | 33.33% | 2.210  | ± | 0.008 | -8.603  | ± | 0.102 |
|         |      | <b>1j</b> | 66.67% | 0.165  | ± | 0.051 | -9.590  | ± | 0.052 |
|         |      |           | 33.33% | 6.894  | ± | 0.022 | -7.691  | ± | 0.137 |
|         |      | <b>1k</b> | 33.33% | 0.027  | ± | 0.010 | -10.766 | ± | 0.008 |
|         |      |           | 33.33% | 0.898  | ± | 0.005 | -10.430 | ± | 0.003 |
|         |      |           | 33.33% | 6.815  | ± | 0.010 | -8.274  | ± | 0.147 |
| CYP3A4  | 8EXB | <b>1a</b> | 33.33% | 11.441 | ± | 0.030 | -4.394  | ± | 0.210 |
|         |      | <b>1b</b> | 33.33% | 3.400  | ± | 0.026 | -8.502  | ± | 0.015 |
|         |      |           | 33.33% | 14.114 | ± | 0.012 | -5.751  | ± | 0.134 |
|         |      | <b>1c</b> | 63.33% | 0.161  | ± | 0.072 | -8.818  | ± | 0.068 |
|         |      | <b>1d</b> | 33.33% | 7.278  | ± | 0.028 | -4.545  | ± | 0.220 |
|         |      |           | 33.33% | 11.036 | ± | 0.009 | -8.505  | ± | 0.010 |
|         |      | <b>1e</b> | 33.33% | 0.213  | ± | 0.077 | -9.286  | ± | 0.045 |
|         |      |           | 33.33% | 11.779 | ± | 0.015 | -8.204  | ± | 0.009 |
|         |      | <b>1f</b> | 33.33% | 0.079  | ± | 0.042 | -9.339  | ± | 0.026 |
|         |      | <b>1g</b> | 33.33% | 11.174 | ± | 0.005 | -8.100  | ± | 0.052 |
|         |      | <b>1h</b> | 33.33% | 1.883  | ± | 0.393 | -9.484  | ± | 0.182 |
|         |      | <b>1i</b> | 33.33% | 0.060  | ± | 0.026 | -10.209 | ± | 0.021 |
|         |      |           | 33.33% | 12.226 | ± | 0.001 | -9.097  | ± | 0.002 |
|         |      | <b>1j</b> | 33.33% | 10.396 | ± | 0.023 | -8.024  | ± | 0.067 |
|         |      | <b>1k</b> | 33.33% | 0.096  | ± | 0.041 | -9.432  | ± | 0.038 |
|         |      |           | 33.33% | 5.095  | ± | 0.013 | -5.720  | ± | 0.085 |
|         |      |           | 33.33% | 10.671 | ± | 0.011 | -8.871  | ± | 0.017 |
| Cdk2/CE | 7E34 | <b>1a</b> | 33.33% | 0.047  | ± | 0.019 | -9.217  | ± | 0.015 |
|         |      |           | 33.33% | 3.634  | ± | 0.015 | -7.755  | ± | 0.010 |
|         |      |           | 33.33% | 7.780  | ± | 0.007 | -6.229  | ± | 0.080 |
|         |      | <b>1b</b> | 33.33% | 0.062  | ± | 0.018 | -8.401  | ± | 0.009 |
|         |      |           | 33.33% | 2.483  | ± | 0.001 | -8.083  | ± | 0.013 |
|         |      | <b>1c</b> | 33.33% | 6.885  | ± | 0.008 | -7.532  | ± | 0.073 |

|      |      |           |        |        |   |       |         |   |       |
|------|------|-----------|--------|--------|---|-------|---------|---|-------|
|      |      |           | 33.33% | 8.494  | ± | 0.001 | -7.044  | ± | 0.006 |
|      |      | <b>1d</b> | 33.33% | 0.078  | ± | 0.029 | -8.615  | ± | 0.020 |
|      |      |           | 33.33% | 7.300  | ± | 0.001 | -7.937  | ± | 0.006 |
|      |      |           | 33.33% | 8.431  | ± | 0.010 | -7.488  | ± | 0.139 |
|      |      | <b>1e</b> | 33.33% | 0.103  | ± | 0.029 | -8.213  | ± | 0.022 |
|      |      |           | 33.33% | 6.945  | ± | 0.001 | -7.053  | ± | 0.003 |
|      |      |           | 33.33% | 7.131  | ± | 0.015 | -6.187  | ± | 0.147 |
|      |      | <b>1f</b> | 65.00% | 0.054  | ± | 0.018 | -8.640  | ± | 0.013 |
|      |      | <b>1g</b> | 53.33% | 7.758  | ± | 0.195 | -7.415  | ± | 0.701 |
|      |      | <b>1h</b> | 33.33% | 8.600  | ± | 0.007 | -7.234  | ± | 0.291 |
|      |      | <b>1i</b> | 33.33% | 0.059  | ± | 0.019 | -7.994  | ± | 0.015 |
|      |      |           | 33.33% | 2.198  | ± | 0.035 | -7.463  | ± | 0.024 |
|      |      |           | 33.33% | 9.619  | ± | 0.003 | -5.745  | ± | 0.041 |
|      |      | <b>1j</b> | 33.33% | 5.747  | ± | 0.011 | -6.977  | ± | 0.047 |
|      |      | <b>1k</b> | 33.33% | 0.064  | ± | 0.026 | -8.901  | ± | 0.033 |
|      |      |           | 33.33% | 7.294  | ± | 0.004 | -8.620  | ± | 0.017 |
|      |      |           | 33.33% | 7.965  | ± | 0.010 | -6.851  | ± | 0.010 |
| IDE  | 6EDS | <b>1a</b> | 50.00% | 11.756 | ± | 0.070 | -6.662  | ± | 0.230 |
|      |      | <b>1b</b> | 61.67% | 0.121  | ± | 0.067 | -8.905  | ± | 0.098 |
|      |      | <b>1c</b> | 66.67% | 0.137  | ± | 0.096 | -8.669  | ± | 0.106 |
|      |      | <b>1d</b> | 33.33% | 0.069  | ± | 0.021 | -8.000  | ± | 0.014 |
|      |      | <b>1e</b> | 33.33% | 0.048  | ± | 0.023 | -8.710  | ± | 0.010 |
|      |      |           | 33.33% | 5.783  | ± | 0.003 | -7.610  | ± | 0.011 |
|      |      | <b>1f</b> | 33.33% | 0.062  | ± | 0.021 | -7.860  | ± | 0.014 |
|      |      |           | 33.33% | 12.276 | ± | 0.004 | -6.622  | ± | 0.004 |
|      |      | <b>1g</b> | 33.33% | 0.095  | ± | 0.035 | -8.550  | ± | 0.026 |
|      |      | <b>1h</b> | 33.33% | 0.274  | ± | 0.070 | -8.305  | ± | 0.022 |
|      |      | <b>1i</b> | 31.67% | 8.030  | ± | 0.008 | -7.780  | ± | 0.008 |
|      |      |           | 31.67% | 12.749 | ± | 0.036 | -4.619  | ± | 0.468 |
|      |      | <b>1j</b> | 31.67% | 0.216  | ± | 0.087 | -8.750  | ± | 0.053 |
|      |      | <b>1k</b> | 56.67% | 7.098  | ± | 0.051 | -7.160  | ± | 1.442 |
| AKT1 | 5KCV | <b>1a</b> | 33.33% | 0.071  | ± | 0.030 | -11.183 | ± | 0.010 |
|      |      |           | 33.33% | 8.267  | ± | 0.002 | -9.999  | ± | 0.006 |
|      |      |           | 33.33% | 8.813  | ± | 0.008 | -6.492  | ± | 0.121 |
|      |      | <b>1b</b> | 33.33% | 0.007  | ± | 0.005 | -10.306 | ± | 0.004 |
|      |      |           | 33.33% | 0.535  | ± | 0.010 | -10.132 | ± | 0.009 |
|      |      | <b>1c</b> | 48.33% | 0.520  | ± | 0.009 | -10.244 | ± | 0.013 |
|      |      | <b>1d</b> | 66.67% | 0.110  | ± | 0.062 | -11.240 | ± | 0.032 |

|        |      |                        |         |                |                 |
|--------|------|------------------------|---------|----------------|-----------------|
|        |      | <b>1e</b>              | 33.33%  | 0.049 ± 0.031  | -10.610 ± 0.009 |
|        |      |                        | 33.33%  | 5.422 ± 0.001  | -10.396 ± 0.006 |
|        |      |                        | 33.33%  | 5.737 ± 0.005  | -7.074 ± 0.005  |
|        |      | <b>1f</b>              | 66.67%  | 0.135 ± 0.035  | -10.938 ± 0.024 |
|        |      | <b>1g</b>              | 33.33%  | 0.038 ± 0.016  | -10.823 ± 0.013 |
|        |      |                        | 33.33%  | 5.941 ± 0.006  | -9.988 ± 0.011  |
|        |      |                        | 33.33%  | 6.889 ± 0.053  | -5.885 ± 0.272  |
|        |      | <b>1h</b>              | 33.33%  | 0.074 ± 0.023  | -11.930 ± 0.020 |
|        |      | <b>1i</b>              | 60.00%  | 0.811 ± 0.010  | -10.717 ± 0.044 |
|        |      | <b>1j</b>              | 33.33%  | 0.058 ± 0.024  | -10.342 ± 0.020 |
|        |      |                        | 33.33%  | 5.886 ± 0.028  | -5.838 ± 0.255  |
|        |      |                        | 33.33%  | 7.727 ± 0.036  | -9.648 ± 0.079  |
|        |      | <b>1k</b>              | 66.67%  | 0.177 ± 0.110  | -11.185 ± 0.047 |
| cTn    | 4Y99 | <b>1a</b><br><b>1b</b> | 35.00%  | 10.291 ± 0.064 | -5.744 ± 0.090  |
|        |      |                        | 33.33%  | 1.978 ± 0.008  | -4.920 ± 0.005  |
|        |      |                        | 33.33%  | 9.893 ± 0.005  | -4.403 ± 0.047  |
|        |      | <b>1c</b>              | 66.67%  | 6.175 ± 0.047  | -4.163 ± 1.153  |
|        |      | <b>1d</b>              | 33.67%  | 8.611 ± 0.010  | -4.324 ± 0.238  |
|        |      | <b>1e</b>              | 35.00%  | 8.044 ± 0.069  | -4.113 ± 0.383  |
|        |      | <b>1f</b>              | 33.33%  | 0.046 ± 0.019  | -5.886 ± 0.008  |
|        |      |                        | 33.33%  | 10.688 ± 0.037 | -4.681 ± 0.122  |
|        |      |                        | 33.33%  | 11.127 ± 0.085 | -5.483 ± 0.129  |
|        |      | <b>1g</b>              | 33.33%  | 0.089 ± 0.030  | -5.550 ± 0.015  |
|        |      |                        | 33.33%  | 1.818 ± 0.016  | -5.138 ± 0.010  |
|        |      | <b>1h</b>              | 41.67%  | 5.569 ± 0.010  | -4.155 ± 0.148  |
|        |      | <b>1i</b>              | 33.33%  | 0.044 ± 0.017  | -6.097 ± 0.011  |
|        |      |                        | 33.33%  | 7.434 ± 0.004  | -5.129 ± 0.015  |
|        |      |                        | 33.33%  | 9.762 ± 0.025  | -3.594 ± 0.064  |
|        |      | <b>1j</b>              | 90.00%  | 7.385 ± 0.074  | -5.350 ± 0.448  |
|        |      | <b>1k</b>              | 58.33%  | 10.651 ± 0.014 | -4.992 ± 0.753  |
| CYP2C9 | 1R9O | <b>1a</b>              | 65.00%  | 0.085 ± 0.068  | -7.865 ± 0.056  |
|        |      | <b>1b</b>              | 100.00% | 0.201 ± 0.176  | -8.319 ± 0.289  |
|        |      | <b>1c</b>              | 66.67%  | 0.089 ± 0.057  | -8.825 ± 0.070  |
|        |      | <b>1d</b>              | 66.67%  | 0.080 ± 0.034  | -6.895 ± 0.028  |
|        |      | <b>1e</b>              | 66.67%  | 0.127 ± 0.123  | -9.125 ± 0.107  |
|        |      | <b>1f</b>              | 66.67%  | 6.690 ± 0.058  | -6.603 ± 0.302  |
|        |      | <b>1g</b>              | 33.33%  | 6.905 ± 0.002  | -7.464 ± 0.010  |
|        |      |                        | 33.33%  | 7.119 ± 0.027  | -6.651 ± 0.250  |
|        |      | <b>1h</b>              | 66.67%  | 0.004 ± 0.004  | -8.642 ± 0.010  |

|      |      |           |        |               |                |
|------|------|-----------|--------|---------------|----------------|
|      |      | <b>1i</b> | 33.33% | 0.063 ± 0.022 | -9.677 ± 0.030 |
|      |      |           | 33.33% | 7.920 ± 0.001 | -8.343 ± 0.006 |
|      |      |           | 33.33% | 8.112 ± 0.001 | -7.509 ± 0.017 |
|      |      | <b>1j</b> | 33.33% | 0.016 ± 0.008 | -7.579 ± 0.012 |
|      |      |           | 33.33% | 5.695 ± 0.047 | -5.641 ± 0.190 |
|      |      | <b>1k</b> | 33.33% | 0.015 ± 0.009 | -7.447 ± 0.010 |
|      |      |           | 33.33% | 1.175 ± 0.001 | -7.197 ± 0.007 |
|      |      |           | 33.33% | 8.746 ± 0.001 | -6.514 ± 0.042 |
| CTSS | 2FRA | <b>1a</b> | 33.33% | 0.096 ± 0.033 | -7.859 ± 0.038 |
|      |      |           | 33.33% | 5.444 ± 0.013 | -5.409 ± 0.084 |
|      |      |           | 33.33% | 8.425 ± 0.004 | -7.358 ± 0.009 |
|      |      | <b>1b</b> | 33.33% | 0.069 ± 0.019 | -8.127 ± 0.019 |
|      |      |           | 33.33% | 1.089 ± 0.007 | -6.677 ± 0.069 |
|      |      |           | 33.33% | 7.935 ± 0.004 | -7.747 ± 0.007 |
|      |      | <b>1c</b> | 35.00% | 0.674 ± 0.086 | -6.788 ± 0.442 |
|      |      | <b>1d</b> | 33.33% | 0.135 ± 0.052 | -7.675 ± 0.040 |
|      |      |           | 33.33% | 6.899 ± 0.010 | -5.892 ± 0.099 |
|      |      |           | 33.33% | 8.278 ± 0.004 | -7.103 ± 0.008 |
|      |      | <b>1e</b> | 33.33% | 0.057 ± 0.020 | -8.057 ± 0.025 |
|      |      |           | 33.33% | 1.299 ± 0.005 | -6.160 ± 0.021 |
|      |      |           | 33.33% | 8.084 ± 0.013 | -7.017 ± 0.048 |
|      |      | <b>1f</b> | 33.33% | 0.084 ± 0.024 | -7.625 ± 0.033 |
|      |      |           | 33.33% | 6.806 ± 0.012 | -5.677 ± 0.107 |
|      |      |           | 33.33% | 7.730 ± 0.013 | -7.471 ± 0.045 |
|      |      | <b>1g</b> | 33.33% | 0.116 ± 0.050 | -8.290 ± 0.046 |
|      |      |           | 33.33% | 7.687 ± 0.015 | -7.744 ± 0.014 |
|      |      | <b>1h</b> | 33.33% | 8.296 ± 0.061 | -8.624 ± 0.265 |
|      |      | <b>1i</b> | 66.67% | 0.251 ± 0.203 | -8.690 ± 0.210 |
|      |      | <b>1j</b> | 33.33% | 0.046 ± 0.016 | -7.374 ± 0.013 |
|      |      |           | 33.33% | 7.333 ± 0.004 | -6.747 ± 0.011 |
|      |      |           | 33.33% | 8.601 ± 0.009 | -5.827 ± 0.151 |
|      |      | <b>1k</b> | 33.33% | 0.065 ± 0.030 | -8.122 ± 0.016 |
|      |      |           | 33.33% | 0.776 ± 0.003 | -7.904 ± 0.019 |
|      |      |           | 33.33% | 1.371 ± 0.008 | -6.805 ± 0.074 |
| CDK4 | 2W9Z | <b>1a</b> | 33.33% | 0.041 ± 0.018 | -8.531 ± 0.015 |
|      |      |           | 33.33% | 2.419 ± 0.003 | -7.834 ± 0.010 |
|      |      |           | 33.33% | 8.323 ± 0.001 | -6.891 ± 0.102 |
|      |      | <b>1b</b> | 33.33% | 0.088 ± 0.030 | -8.295 ± 0.025 |
|      |      |           | 33.33% | 2.049 ± 0.007 | -8.163 ± 0.015 |



|      |      |           |        |        |   |       |         |   |       |
|------|------|-----------|--------|--------|---|-------|---------|---|-------|
|      |      |           | 33.33% | 8.048  | ± | 0.005 | -6.055  | ± | 0.069 |
|      |      | <b>1c</b> | 33.33% | 1.327  | ± | 0.015 | -8.266  | ± | 0.020 |
|      |      |           | 33.33% | 9.171  | ± | 0.016 | -6.337  | ± | 0.063 |
|      |      | <b>1d</b> | 33.33% | 1.144  | ± | 0.051 | -8.083  | ± | 0.015 |
|      |      | <b>1e</b> | 33.33% | 0.072  | ± | 0.031 | -8.338  | ± | 0.026 |
|      |      |           | 33.33% | 9.458  | ± | 2.703 | -5.633  | ± | 0.125 |
|      |      | <b>1f</b> | 33.33% | 0.097  | ± | 0.090 | -8.201  | ± | 0.022 |
|      |      |           | 33.33% | 0.571  | ± | 0.031 | -8.141  | ± | 0.009 |
|      |      |           | 33.33% | 3.658  | ± | 0.006 | -4.073  | ± | 0.110 |
|      |      | <b>1g</b> | 33.33% | 0.275  | ± | 0.069 | -7.483  | ± | 0.145 |
|      |      |           | 33.33% | 5.416  | ± | 0.042 | -5.589  | ± | 0.237 |
|      |      | <b>1h</b> | 33.33% | 0.146  | ± | 0.057 | -8.535  | ± | 0.126 |
|      |      | <b>1i</b> | 33.33% | 0.710  | ± | 0.003 | -8.548  | ± | 0.003 |
|      |      | <b>1j</b> | 33.33% | 0.055  | ± | 0.022 | -8.517  | ± | 0.026 |
|      |      |           | 33.33% | 8.700  | ± | 0.004 | -7.203  | ± | 0.014 |
|      |      | <b>1k</b> | 33.33% | 0.065  | ± | 0.050 | -8.561  | ± | 0.016 |
|      |      |           | 33.33% | 0.871  | ± | 0.001 | -8.230  | ± | 0.004 |
| Ox2R | 6TPN | <b>1a</b> | 66.67% | 0.251  | ± | 0.128 | -9.764  | ± | 0.141 |
|      |      | <b>1b</b> | 66.67% | 0.208  | ± | 0.119 | -9.865  | ± | 0.182 |
|      |      | <b>1c</b> | 66.67% | 0.164  | ± | 0.115 | -9.830  | ± | 0.157 |
|      |      |           | 28.33% | 5.138  | ± | 1.016 | -6.785  | ± | 0.433 |
|      |      | <b>1d</b> | 66.67% | 0.236  | ± | 0.218 | -7.869  | ± | 1.755 |
|      |      |           | 31.67% | 8.544  | ± | 0.021 | -6.185  | ± | 0.105 |
|      |      | <b>1e</b> | 66.67% | 0.175  | ± | 0.128 | -9.558  | ± | 0.206 |
|      |      |           | 31.67% | 11.561 | ± | 0.012 | -6.172  | ± | 0.112 |
|      |      | <b>1f</b> | 33.33% | 0.865  | ± | 0.001 | -9.428  | ± | 0.007 |
|      |      |           | 33.33% | 0.090  | ± | 0.032 | -9.933  | ± | 0.026 |
|      |      |           | 31.67% | 9.105  | ± | 0.004 | -5.534  | ± | 0.021 |
|      |      | <b>1g</b> | 33.33% | 0.787  | ± | 0.004 | -8.880  | ± | 0.017 |
|      |      |           | 33.33% | 0.088  | ± | 0.043 | -9.021  | ± | 0.032 |
|      |      |           | 26.67% | 11.292 | ± | 0.118 | -4.285  | ± | 0.340 |
|      |      | <b>1h</b> | 33.33% | 0.057  | ± | 0.023 | -10.154 | ± | 0.015 |
|      |      |           | 33.33% | 1.173  | ± | 0.013 | -9.354  | ± | 0.015 |
|      |      |           | 33.33% | 4.436  | ± | 0.017 | -7.449  | ± | 0.263 |
|      |      | <b>1i</b> | 33.33% | 0.840  | ± | 0.001 | -9.904  | ± | 0.009 |
|      |      |           | 33.33% | 0.052  | ± | 0.020 | -10.110 | ± | 0.014 |
|      |      |           | 31.67% | 8.633  | ± | 0.005 | -7.506  | ± | 0.044 |
|      |      | <b>1j</b> | 66.67% | 0.246  | ± | 0.159 | -9.655  | ± | 0.168 |
|      |      |           | 28.33% | 11.345 | ± | 0.093 | -7.111  | ± | 0.345 |

|          |      |           |        |                |                 |
|----------|------|-----------|--------|----------------|-----------------|
|          |      | <b>1k</b> | 66.67% | 0.257 ± 0.200  | -10.590 ± 0.245 |
|          |      |           | 31.67% | 9.110 ± 0.012  | -5.953 ± 0.129  |
| ghrelinR | 7NA8 | <b>1a</b> | 33.33% | 7.955 ± 0.003  | -6.926 ± 0.039  |
|          |      |           | 33.33% | 0.060 ± 0.018  | -10.569 ± 0.016 |
|          |      |           | 33.33% | 2.625 ± 0.004  | -9.383 ± 0.008  |
|          |      | <b>1b</b> | 33.33% | 0.036 ± 0.016  | -9.874 ± 0.012  |
|          |      |           | 33.33% | 5.439 ± 0.001  | -9.190 ± 0.003  |
|          |      |           | 33.33% | 6.194 ± 0.006  | -8.147 ± 0.074  |
|          |      | <b>1c</b> | 66.67% | 0.239 ± 0.184  | -9.740 ± 0.109  |
|          |      |           | 33.33% | 9.159 ± 0.072  | -6.542 ± 0.529  |
|          |      | <b>1d</b> | 33.33% | 7.561 ± 0.005  | -7.753 ± 0.060  |
|          |      |           | 33.33% | 0.088 ± 0.026  | -10.394 ± 0.020 |
|          |      |           | 33.33% | 9.010 ± 0.001  | -9.683 ± 0.005  |
|          |      | <b>1e</b> | 33.33% | 9.432 ± 0.007  | -6.236 ± 0.119  |
|          |      |           | 33.33% | 0.058 ± 0.021  | -9.700 ± 0.023  |
|          |      |           | 33.33% | 8.803 ± 0.002  | -8.980 ± 0.006  |
|          |      | <b>1f</b> | 66.67% | 0.183 ± 0.101  | -9.589 ± 0.128  |
|          |      |           | 33.33% | 8.695 ± 0.010  | -7.588 ± 0.078  |
|          |      | <b>1g</b> | 66.67% | 0.119 ± 0.071  | -9.471 ± 0.113  |
|          |      |           | 31.67% | 4.882 ± 0.061  | -7.652 ± 0.163  |
|          |      | <b>1h</b> | 66.67% | 0.208 ± 0.123  | -9.917 ± 0.172  |
|          |      | <b>1i</b> | 33.33% | 11.375 ± 0.007 | -8.477 ± 0.036  |
|          |      |           | 33.33% | 0.067 ± 0.029  | -10.711 ± 0.034 |
|          |      |           | 33.33% | 8.672 ± 0.002  | -9.767 ± 0.006  |
|          |      | <b>1j</b> | 66.67% | 0.131 ± 0.070  | -9.929 ± 0.419  |
|          |      | <b>1k</b> | 33.33% | 7.546 ± 0.006  | -8.342 ± 0.038  |
|          |      |           | 33.33% | 0.047 ± 0.019  | -10.913 ± 0.015 |
|          |      |           | 33.33% | 9.272 ± 0.001  | -10.050 ± 0.006 |
| Cdk2/CA  | 2R3F | <b>1a</b> | 38.33% | 0.035 ± 0.020  | -7.660 ± 0.009  |
|          |      | <b>1b</b> | 66.67% | 0.131 ± 0.058  | -8.180 ± 0.083  |
|          |      | <b>1c</b> | 66.67% | 0.152 ± 0.092  | -8.170 ± 0.119  |
|          |      | <b>1d</b> | 33.33% | 0.093 ± 0.027  | -6.680 ± 0.010  |
|          |      |           | 33.33% | 7.373 ± 0.002  | -5.272 ± 0.015  |
|          |      | <b>1e</b> | 33.33% | 0.049 ± 0.022  | -8.060 ± 0.025  |
|          |      |           | 33.33% | 7.589 ± 0.037  | -6.160 ± 0.021  |
|          |      |           | 33.33% | 9.074 ± 0.007  | -7.017 ± 0.048  |
|          |      | <b>1f</b> | 61.67% | 7.302 ± 0.191  | 6.538 ± 22.900  |
|          |      | <b>1g</b> | 66.67% | 7.676 ± 0.131  | -6.270 ± 0.404  |
|          |      | <b>1h</b> | 66.67% | 7.661 ± 0.147  | -6.031 ± 0.339  |

|              |      |           |        |        |   |       |        |   |       |
|--------------|------|-----------|--------|--------|---|-------|--------|---|-------|
|              |      | <b>1i</b> | 33.33% | 0.028  | ± | 0.009 | -8.000 | ± | 0.014 |
|              |      |           | 33.33% | 9.401  | ± | 0.006 | -5.229 | ± | 0.105 |
|              |      | <b>1j</b> | 33.33% | 0.067  | ± | 0.026 | -6.915 | ± | 0.038 |
|              |      |           | 33.33% | 10.191 | ± | 0.038 | -5.512 | ± | 0.207 |
| p38 $\alpha$ | 6SF1 | <b>1k</b> | 33.33% | 0.026  | ± | 0.010 | -7.133 | ± | 0.010 |
|              |      | <b>1a</b> | 66.67% | 1.091  | ± | 0.007 | -7.122 | ± | 0.145 |
|              |      |           | 66.67% | 0.196  | ± | 0.155 | -7.825 | ± | 0.169 |
|              |      | <b>1c</b> | 66.67% | 0.176  | ± | 0.104 | -7.397 | ± | 0.125 |
|              |      | <b>1d</b> | 50.00% | 0.779  | ± | 0.139 | -5.644 | ± | 0.635 |
|              |      | <b>1e</b> | 66.67% | 0.173  | ± | 0.125 | -7.351 | ± | 0.206 |
|              |      | <b>1f</b> | 35.00% | 0.763  | ± | 0.021 | -5.520 | ± | 0.148 |
|              |      | <b>1g</b> | 61.67% | 0.724  | ± | 0.231 | -7.530 | ± | 0.203 |
|              |      | <b>1h</b> | 66.67% | 0.208  | ± | 0.153 | -7.753 | ± | 0.269 |
|              |      | <b>1i</b> | 40.00% | 0.930  | ± | 0.018 | -6.352 | ± | 0.728 |
|              |      | <b>1j</b> | 33.33% | 0.030  | ± | 0.009 | -6.871 | ± | 0.028 |
|              |      |           | 33.33% | 0.910  | ± | 0.006 | -6.157 | ± | 0.098 |
|              |      |           | 33.33% | 8.927  | ± | 0.010 | -5.235 | ± | 0.111 |
|              |      | <b>1k</b> | 33.33% | 0.050  | ± | 0.017 | -8.146 | ± | 0.049 |
|              |      |           | 33.33% | 0.989  | ± | 0.005 | -6.410 | ± | 0.053 |
|              |      |           | 33.33% | 8.960  | ± | 0.004 | -5.878 | ± | 0.014 |
| MAPK8        | 5IU2 | <b>1a</b> | 33.33% | 0.052  | ± | 0.020 | -9.490 | ± | 0.013 |
|              |      | <b>1b</b> | 33.33% | 0.060  | ± | 0.017 | -9.610 | ± | 0.013 |
|              |      |           | 33.33% | 1.706  | ± | 0.002 | -9.206 | ± | 0.005 |
|              |      |           | 33.33% | 2.157  | ± | 0.003 | -8.840 | ± | 0.115 |
|              |      | <b>1c</b> | 33.33% | 0.066  | ± | 0.019 | -9.370 | ± | 0.035 |
|              |      |           | 33.33% | 2.044  | ± | 0.008 | -7.963 | ± | 0.038 |
|              |      | <b>1d</b> | 33.33% | 0.055  | ± | 0.022 | -9.442 | ± | 0.014 |
|              |      |           | 33.33% | 7.782  | ± | 0.007 | -6.128 | ± | 0.058 |
|              |      | <b>1e</b> | 33.33% | 0.099  | ± | 0.038 | -9.822 | ± | 0.037 |
|              |      |           | 33.33% | 1.022  | ± | 0.001 | -9.560 | ± | 0.008 |
|              |      |           | 33.33% | 2.833  | ± | 0.024 | -5.766 | ± | 0.145 |
|              |      | <b>1f</b> | 35.00% | 7.810  | ± | 0.023 | -6.073 | ± | 0.236 |
|              |      | <b>1g</b> | 33.33% | 0.043  | ± | 0.020 | -9.216 | ± | 0.016 |
|              |      |           | 33.33% | 5.202  | ± | 0.010 | -7.676 | ± | 0.082 |
|              |      |           | 33.33% | 11.167 | ± | 0.004 | -5.219 | ± | 0.010 |
|              |      | <b>1h</b> | 58.00% | 0.080  | ± | 0.055 | -9.228 | ± | 0.091 |
|              |      | <b>1i</b> | 55.00% | 0.086  | ± | 0.045 | -9.648 | ± | 1.443 |
|              |      | <b>1j</b> | 38.33% | 7.605  | ± | 0.095 | -5.640 | ± | 0.467 |
|              |      | <b>1k</b> | 65.00% | 1.533  | ± | 0.249 | -9.750 | ± | 0.072 |

| Protein | ID PDB | Ligand | Cluster Percentage | RMSD (Å) |   |       | Energy (Kcal/mol) |   |       |
|---------|--------|--------|--------------------|----------|---|-------|-------------------|---|-------|
| CTSL    | 8C77   | 1a     | 31.67%             | 0.038    | ± | 0.015 | -7.101            | ± | 0.008 |
|         |        |        | 33.33%             | 4.376    | ± | 0.004 | -3.585            | ± | 0.068 |
|         |        |        | 33.33%             | 5.697    | ± | 0.022 | -5.715            | ± | 0.019 |
|         |        | 1b     | 33.33%             | 0.067    | ± | 0.023 | -6.674            | ± | 0.020 |
|         |        |        | 33.33%             | 8.469    | ± | 0.004 | -5.320            | ± | 0.009 |
|         |        |        | 30.00%             | 9.580    | ± | 0.058 | -4.249            | ± | 0.579 |
|         |        | 1c     | 33.33%             | 0.105    | ± | 0.034 | -7.042            | ± | 0.021 |
|         |        |        | 30.00%             | 3.995    | ± | 0.003 | -5.666            | ± | 0.004 |
|         |        |        | 33.33%             | 9.771    | ± | 0.042 | -5.006            | ± | 0.175 |
|         |        | 1d     | 66.67%             | 0.181    | ± | 0.081 | -6.444            | ± | 0.082 |
|         |        |        | 26.67%             | 8.125    | ± | 0.006 | -3.153            | ± | 0.097 |
|         |        | 1e     | 33.33%             | 0.054    | ± | 0.020 | -6.759            | ± | 0.009 |
|         |        | 1f     | 33.33%             | 0.109    | ± | 0.102 | -6.521            | ± | 0.076 |
|         |        |        | 33.33%             | 1.165    | ± | 0.013 | -6.320            | ± | 0.009 |
|         |        |        | 33.33%             | 5.285    | ± | 0.060 | -4.216            | ± | 0.357 |
|         |        | 1g     | 33.33%             | 1.678    | ± | 0.116 | -2.654            | ± | 0.213 |
|         |        |        | 33.33%             | 6.086    | ± | 0.019 | -5.367            | ± | 0.010 |
|         |        | 1h     | 30.00%             | 7.435    | ± | 0.013 | -4.927            | ± | 0.187 |
|         |        |        | 33.33%             | 10.265   | ± | 0.028 | -5.904            | ± | 0.012 |
|         |        | 1i     | 31.67%             | 1.634    | ± | 0.021 | -7.342            | ± | 0.031 |
|         |        |        | 33.33%             | 7.967    | ± | 0.000 | -5.916            | ± | 0.002 |
|         |        |        | 33.33%             | 10.072   | ± | 0.006 | -4.726            | ± | 0.115 |
|         |        | 1j     | 33.33%             | 1.236    | ± | 0.087 | -4.931            | ± | 0.873 |
|         |        |        | 33.33%             | 7.578    | ± | 0.003 | -5.802            | ± | 0.006 |
|         |        | 1k     | 33.33%             | 0.067    | ± | 0.024 | -6.583            | ± | 0.014 |
|         |        |        | 33.33%             | 5.292    | ± | 0.165 | -5.407            | ± | 0.910 |

**Table S4.** Key ADMETox Predicted Properties of the compounds **1a-k**. This table summarizes the most relevant ADMETox (Absorption, Distribution, Metabolism, Excretion, and Toxicity) predicted properties for the compounds **1a-k**.

|                     | Parameters               | 1a       | 1b       | 1c       | 1d       | 1e       | 1f       | 1g       | 1h       | 1i       | 1j       | 1k       |
|---------------------|--------------------------|----------|----------|----------|----------|----------|----------|----------|----------|----------|----------|----------|
| Properties          | Molecular weight (g/mol) | 455.5    | 459.54   | 459.54   | 455.51   | 469.54   | 487.64   | 463.57   | 475.58   | 475.58   | 463.57   | 461.56   |
|                     | Heavy atoms              | 34       | 34       | 34       | 34       | 34       | 34       | 35       | 36       | 36       | 35       | 35       |
|                     | Arom. heavy atoms        | 22       | 17       | 17       | 22       | 17       | 33       | 24       | 24       | 24       | 24       | 24       |
|                     | Rotatable bonds          | 6        | 6        | 6        | 6        | 6        | 6        | 8        | 6        | 6        | 8        | 6        |
|                     | H-bond acceptors         | 5        | 5        | 5        | 5        | 5        | 3        | 4        | 4        | 4        | 4        | 4        |
|                     | H-bond donors            | 0        | 0        | 0        | 0        | 0        | 0        | 0        | 0        | 0        | 0        | 0        |
|                     | Molar Refractivity       | 132.78   | 134.23   | 134.23   | 132.78   | 134.23   | 144      | 141.93   | 147.56   | 147.56   | 141.93   | 142.75   |
|                     | TPSA (Å)                 | 71.95    | 68.04    | 68.04    | 71.95    | 68.04    | 102.15   | 62.22    | 62.22    | 62.22    | 62.22    | 62.22    |
| Lipophilicity       | Log Po/w                 | 3.98     | 4.04     | 4.01     | 3.92     | 3.87     | 4.46     | 3.78     | 3.83     | 3.87     | 3.79     | 3.6      |
| Water solubility    | Log S (ESOL)             | -4.65    | -4.45    | -4.42    | -4.62    | -4.34    | -5.62    | -5.07    | -5.34    | -5.36    | -5.1     | -5.06    |
| Pharmacokinetics    | GI absorption            | High     |
|                     | BBB                      | Yes      | Yes      | Yes      | Yes      | Yes      | No       | Yes      | Yes      | Yes      | Yes      | Yes      |
|                     | CYP1A2 inhibitor         | No       | No       | No       | No       | No       | No       | Yes      | No       | No       | Yes      | Yes      |
|                     | CYP2C19 inhibitor        | No       | No       | No       | No       | Yes      | No       | Yes      | No       | No       | Yes      | No       |
|                     | CYP2C9 inhibito          | Yes      |
|                     | CYP2D6                   | Yes      |
|                     | CYP3A4 inhibitor         | Yes      |
| Drug likeness       | Lipinski, Violation      | Yes, 0   |
|                     | Bioavailability Score    | 0.55     | 0.55     | 0.55     | 0.55     | 0.55     | 0.55     | 0.55     | 0.55     | 0.55     | 0.55     | 0.55     |
| Medicinal Chemistry | Synthetic accessibility  | 4.24     | 4.62     | 4.6      | 4.28     | 4.6      | 4.18     | 4.2      | 4.18     | 4.19     | 4.17     | 4.1      |
| Organ toxicity      | Hepatotoxicity           | Inactive |
| Toxicity end points | Carcinogenicity          | Inactive |
|                     | Immunotoxicity           | Inactive | Active   | Inactive |
|                     | Mutagenicity             | Inactive |
|                     | Cytotoxicity             | Inactive |

|                                            |                                                               |          |          |          |          |          |          |          |          |          |          |          |
|--------------------------------------------|---------------------------------------------------------------|----------|----------|----------|----------|----------|----------|----------|----------|----------|----------|----------|
| Tox21-Nuclear receptor signalling pathways | Androgen Receptor (AR)                                        | Inactive |
|                                            | Aryl hydrocarbon Receptor (AhR)                               | Inactive |
|                                            | Estrogen Receptor Alpha (ER)                                  | Inactive |
|                                            | Peroxisome Proliferator Activated Receptor Gamma (PPAR-Gamma) | Inactive |
| Tox21-Stress response pathways             | Heat shock factor response element (HSE)                      | Inactive |
|                                            | Mitochondrial Membrane Potential (MMP)                        | Inactive |
|                                            | Phosphoprotein (Tumor Suppressor) p53                         | Inactive |
|                                            | ATPase family AAA domain-containing protein 5 (ATAD5)         | Inactive |
| Predicted LD <sub>50</sub> (mg/kg)         |                                                               | 1600     | 1600     | 1600     | 1600     | 1600     | 1500     | 4000     | 110      | 110      | 2680     | 110      |
| Toxicity class                             |                                                               | 4        | 4        | 4        | 4        | 4        | 4        | 5        | 3        | 3        | 5        | 3        |

**Table S5.** Structural Time Equilibrium Descriptors. This table displays the average and standard deviation of the RMSD (Root Mean Square Deviation) for the protein, ligand, and radius of gyration for each of the replicas during 100 ns of simulation.

| Target protein | Ligand | Replica | RMSD-Protein (Å) |   |        | RMSD Ligand (Å) |   |        | Rgyr (Å) |   |        |
|----------------|--------|---------|------------------|---|--------|-----------------|---|--------|----------|---|--------|
| AKT1           | 1f     | R1      | 2.4025           | ± | 0.2871 | 1.439           | ± | 0.289  | 21.9623  | ± | 0.1803 |
|                |        | R2      | 2.3412           | ± | 0.4007 | 1.5994          | ± | 0.1909 | 21.9238  | ± | 0.1099 |
|                |        | R3      | 2.0905           | ± | 0.2647 | 1.7344          | ± | 0.3844 | 21.8005  | ± | 0.1432 |
|                | 1h     | R1      | 2.8726           | ± | 0.3802 | 2.3619          | ± | 0.3555 | 21.8517  | ± | 0.1034 |
|                |        | R2      | 1.9754           | ± | 0.2241 | 2.5027          | ± | 0.2909 | 21.6567  | ± | 0.0969 |
|                |        | R3      | 2.1812           | ± | 0.2204 | 2.3952          | ± | 0.2048 | 21.8968  | ± | 0.1655 |
|                | 1k     | R1      | 2.4025           | ± | 0.2871 | 1.741           | ± | 0.259  | 21.9125  | ± | 0.1157 |
|                |        | R2      | 2.3412           | ± | 0.4007 | 1.3488          | ± | 0.3475 | 22.0108  | ± | 0.1306 |
|                |        | R3      | 2.0905           | ± | 0.2647 | 1.6949          | ± | 0.3008 | 21.7311  | ± | 0.0842 |
| Ox2R           | 1f     | R1      | 1.9067           | ± | 0.2909 | 2.423           | ± | 0.4735 | 22.0161  | ± | 0.1274 |
|                |        | R2      | 1.543            | ± | 0.1472 | 0.8904          | ± | 0.1294 | 21.8883  | ± | 0.0684 |
|                |        | R3      | 2.3756           | ± | 0.224  | 0.7163          | ± | 0.117  | 22.1307  | ± | 0.1128 |
|                | 1h     | R1      | 1.8107           | ± | 0.21   | 1.8773          | ± | 0.1452 | 21.676   | ± | 0.0824 |
|                |        | R2      | 1.8083           | ± | 0.2014 | 2.0377          | ± | 0.153  | 21.8907  | ± | 0.0888 |
|                |        | R3      | 2.2593           | ± | 0.2931 | 2.0817          | ± | 0.1868 | 21.913   | ± | 0.1278 |
|                | 1k     | R1      | 1.7244           | ± | 0.1655 | 1.4069          | ± | 0.3416 | 21.7798  | ± | 0.0976 |
|                |        | R2      | 1.6152           | ± | 0.195  | 1.2641          | ± | 0.3001 | 21.7052  | ± | 0.096  |
|                |        | R3      | 1.7094           | ± | 0.2523 | 1.4441          | ± | 0.5174 | 21.7755  | ± | 0.1255 |

**Table S6.** Decomposition of Key Amino Acids for Interaction at 5 Å Calculated Using MM/GBSA.

| Target protein   |              |              |               |                   |              |               |              |
|------------------|--------------|--------------|---------------|-------------------|--------------|---------------|--------------|
| AKT <sub>1</sub> |              |              |               | Ox <sub>2</sub> R |              |               |              |
| Aminoacid        | Inhibitor    |              |               | Aminoacid         | Inhibitor    |               |              |
|                  | 1f           | 1h           | 1k            |                   | 1f           | 1h            | 1k           |
| ASN67            | -1.1 ± 1.12  | -1.06 ± 0.79 | -             | VAL78             | -1.56 ± 0.31 | -             | -1.53 ± 0.45 |
| ASN68            | -1.32 ± 0.86 | -            | -0.52 ± 0.25  | THR83             | -1.23 ± 0.36 | -             | -            |
| GLN93            | -2.69 ± 1.26 | -1.22 ± 1.23 | -1.12 ± 0.65  | ILE94             | -0.76 ± 0.3  | -0.6 ± 0.22   | -1.04 ± 0.28 |
| TRP94            | -3.64 ± 1.29 | -2.6 ± 0.86  | -3.67 ± 0.7   | PRO95             | -0.76 ± 0.32 | -0.92 ± 0.36  | -1.38 ± 0.42 |
| THR95            | -            | -            | -0.59 ± 0.2   | GLN98             | -            | -0.68 ± 0.59  | -0.58 ± 0.32 |
| THR96            | -            | -            | -1.2 ± 0.38   | THR99             | -            | -0.69 ± 0.5   | -            |
| GLN217           | -0.58 ± 0.59 | -            | -             | MET155            | -0.8 ± 0.34  | -1.0 ± 0.39   | -0.9 ± 0.37  |
| LEU224           | -            | -1.31 ± 0.57 | -1.47 ± 0.37  | VAL165            | -1.24 ± 0.47 | -             | -1.03 ± 0.36 |
| THR225           | -            | -            | -0.57 ± 0.23  | CYS166            | -            | -             | -0.59 ± 0.45 |
| TYR277           | -            | -            | -0.57 ± 0.24  | ASP167            | 0.84 ± 0.55  | 0.63 ± 0.44   | 1.55 ± 0.74  |
| LEU278           | -0.66 ± 0.24 | -0.63 ± 0.27 | -1.02 ± 0.29  | GLU168            | -            | 1.07 ± 1.08   | -            |
| LYS282           | -0.81 ± 0.5  | -1.07 ± 0.6  | -0.94 ± 0.62  | LYS252            | 0.52 ± 0.46  | -0.91 ± 1.07  | -            |
| VAL284           | -2.02 ± 0.29 | -1.48 ± 0.56 | -2.11 ± 0.29  | PHE258            | -            | -0.5 ± 0.31   | -            |
| TYR286           | -1.08 ± 0.36 | -0.63 ± 0.31 | -1.43 ± 0.31  | ARG264            | -0.55 ± 0.46 | -             | -            |
| ASP288           |              |              | 0.63 ± 0.18   | VAL267            | -0.52 ± 0.27 | -0.53 ± 0.2   | -0.71 ± 0.27 |
| ILE304           |              |              | -0.63 ± 0.28  | TYR268            | -1.79 ± 0.65 | -1.65 ± 1.18  | -1.57 ± 0.64 |
| THR305           |              |              | -1.08 ± 0.33  | PHE271            | -1.17 ± 0.55 | -2.44 ± 0.51  | -1.63 ± 0.57 |
| ASP306           |              | 0.74 ± 0.85  | 1.26 ± 0.63   | HSP275            |              | -2.19 ± 1.82  |              |
| Ligand           | -3.98 ± 0.57 | -8.37 ± 0.16 | -11.77 ± 0.06 | Ligand            | -2.68 ± 0.21 | -11.57 ± 0.81 | -10.3 ± 0.85 |



**Table S7.** 2D and 3D Representations of Optimized Structures for ligands **1a-k**.

| Ligand    | 2D Image                                                                            | 3D Image                                                                             |
|-----------|-------------------------------------------------------------------------------------|--------------------------------------------------------------------------------------|
| <b>1a</b> | 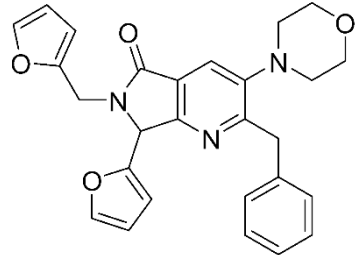   |    |
| <b>1b</b> |    |    |
| <b>1c</b> |   |   |
| <b>1d</b> |  |  |
| <b>1e</b> |  |  |
| <b>1f</b> |  |  |

|           |                                                                                     |                                                                                      |
|-----------|-------------------------------------------------------------------------------------|--------------------------------------------------------------------------------------|
| <b>1g</b> | 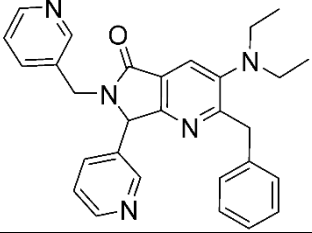   |    |
| <b>1h</b> |    |    |
| <b>1i</b> |    |    |
| <b>1j</b> |   |   |
| <b>1k</b> |  |  |

**Table S8.** Target Proteins. Ribbon representation of the 20 potential target proteins. Modeled sections for each protein are highlighted in orange.

| PDB-D | Image                                                                                |
|-------|--------------------------------------------------------------------------------------|
| 3FHR  | 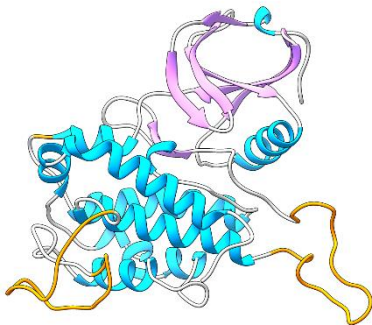   |
| 6TPN  |   |
| 7EPF  |  |
| 7F61  |  |

|      |                                                                                                                                                                                                                                                                                                                                                                                                       |
|------|-------------------------------------------------------------------------------------------------------------------------------------------------------------------------------------------------------------------------------------------------------------------------------------------------------------------------------------------------------------------------------------------------------|
| 7NA8 | 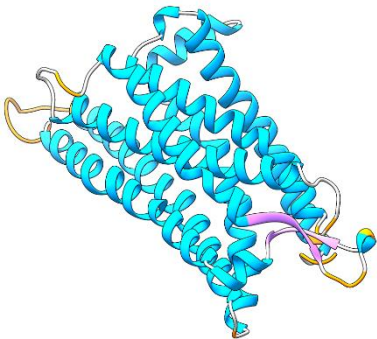 <p>Protein structure 7NA8 is a ribbon diagram of a protein. The main body of the protein is colored cyan, while a specific region at the C-terminus is highlighted in yellow and pink. The structure is shown in a perspective view, highlighting its overall fold and the location of the highlighted region.</p> |
| 7XTB |  <p>Protein structure 7XTB is a ribbon diagram of a protein. The main body of the protein is colored cyan, while a specific region at the C-terminus is highlighted in yellow. The structure is shown in a perspective view, highlighting its overall fold and the location of the highlighted region.</p>          |
| 1R90 |  <p>Protein structure 1R90 is a ribbon diagram of a protein. The main body of the protein is colored cyan, while a specific region is highlighted in yellow and pink. The structure is shown in a perspective view, highlighting its overall fold and the location of the highlighted region.</p>                  |
| 4Y99 |  <p>Protein structure 4Y99 is a ribbon diagram of a protein. The main body of the protein is colored cyan, while a specific region is highlighted in yellow. The structure is shown in a perspective view, highlighting its overall fold and the location of the highlighted region.</p>                          |

|      |                                                                                                                                                                                                                                                                                              |
|------|----------------------------------------------------------------------------------------------------------------------------------------------------------------------------------------------------------------------------------------------------------------------------------------------|
| 5IU2 | 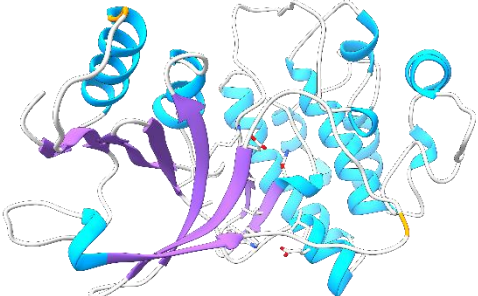 A ribbon diagram of a protein structure (5IU2) showing a complex fold with multiple alpha-helices and beta-sheets. The structure is colored in cyan, purple, and orange, with a grey wireframe overlay.   |
| 5KCV |  A ribbon diagram of a protein structure (5KCV) showing a complex fold with multiple alpha-helices and beta-sheets. The structure is colored in cyan, purple, and orange, with a grey wireframe overlay.   |
| 6EDS |  A ribbon diagram of a protein structure (6EDS) showing a complex fold with multiple alpha-helices and beta-sheets. The structure is colored in cyan, purple, and orange, with a grey wireframe overlay.  |
| 6SFI |  A ribbon diagram of a protein structure (6SFI) showing a complex fold with multiple alpha-helices and beta-sheets. The structure is colored in cyan, purple, and orange, with a grey wireframe overlay. |

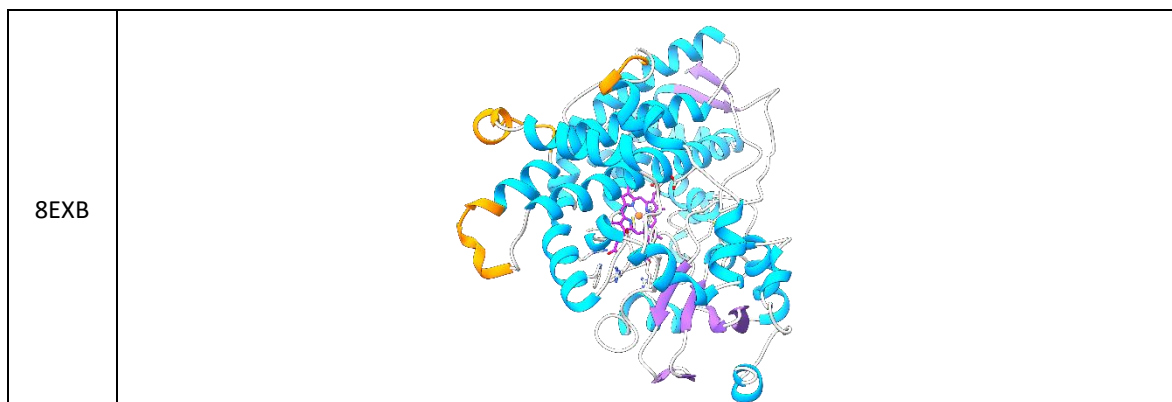

**Figure S24.** Structure of Protein AKT1. The cyan color represents the Pleckstrin Homology domain, yellow indicates the linking loop, and green represents the kinase domain. The red color represents the surface for the allosteric site.

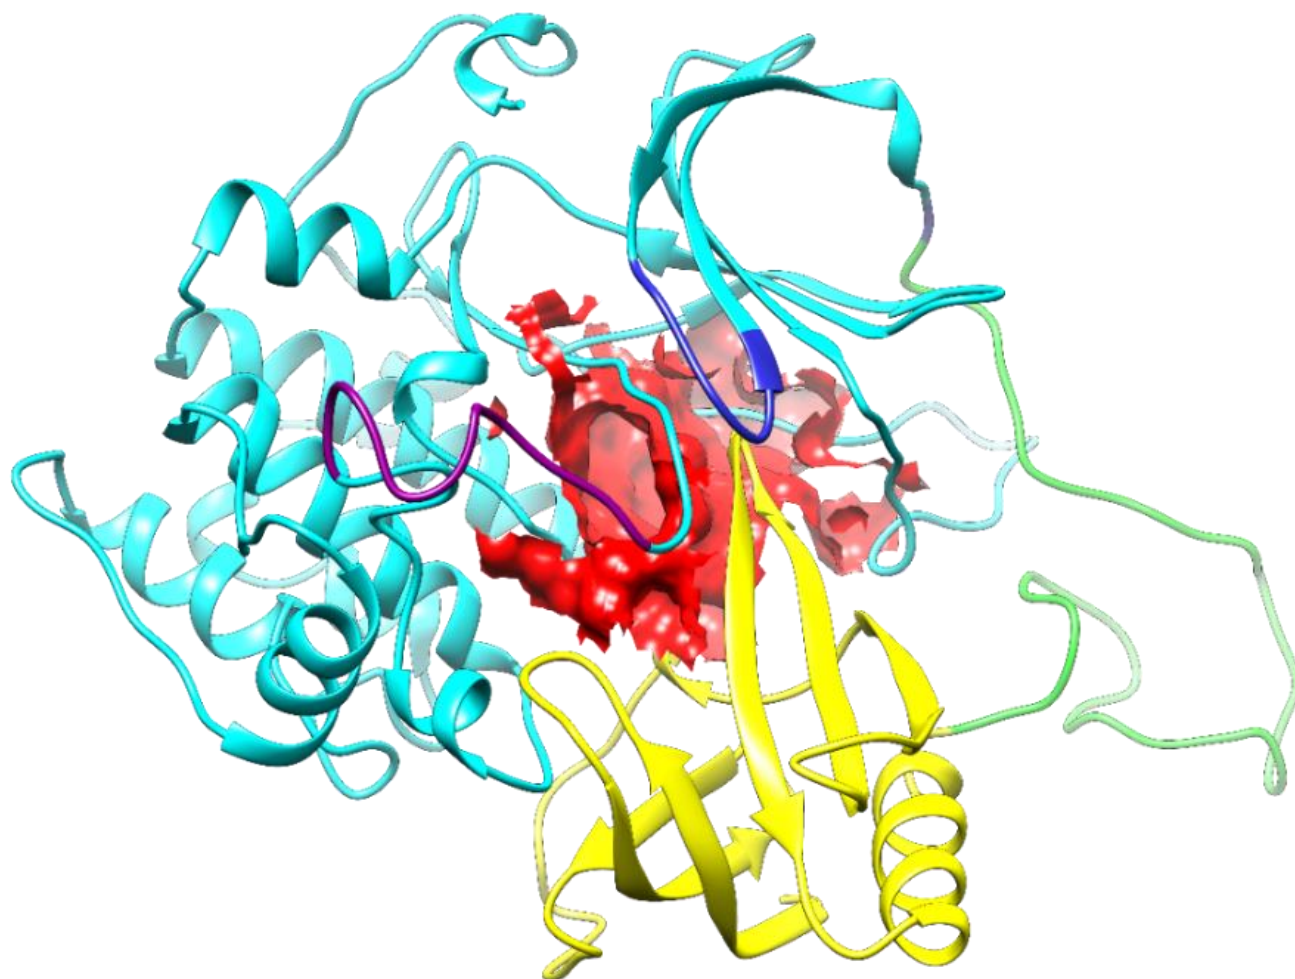



**Figure S25.** Structure of Protein Ox<sub>2</sub>R. The seven transmembrane helices and the horizontal eighth helix are depicted in various colors. The red color represents the surface for the active site.

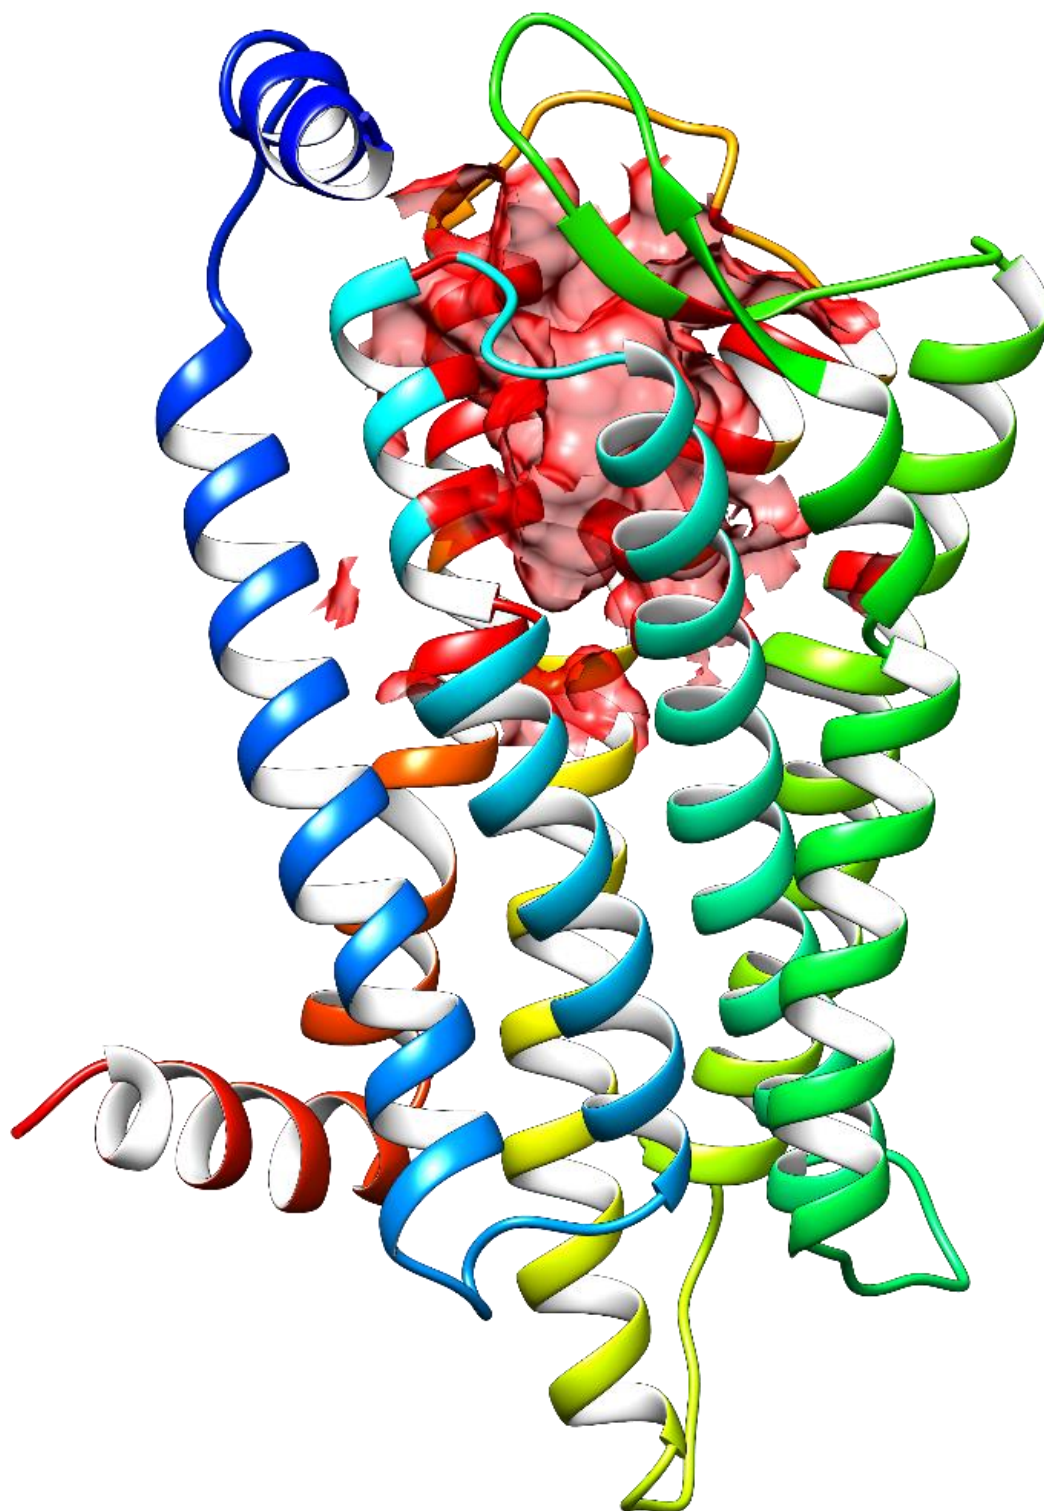



**Figure S26.** Superposition of Representative Structures from Simulations with Ligands **1f**, **1h**, and **1k**. Changes in helices TM5, TM6, and TM7 can be observed.

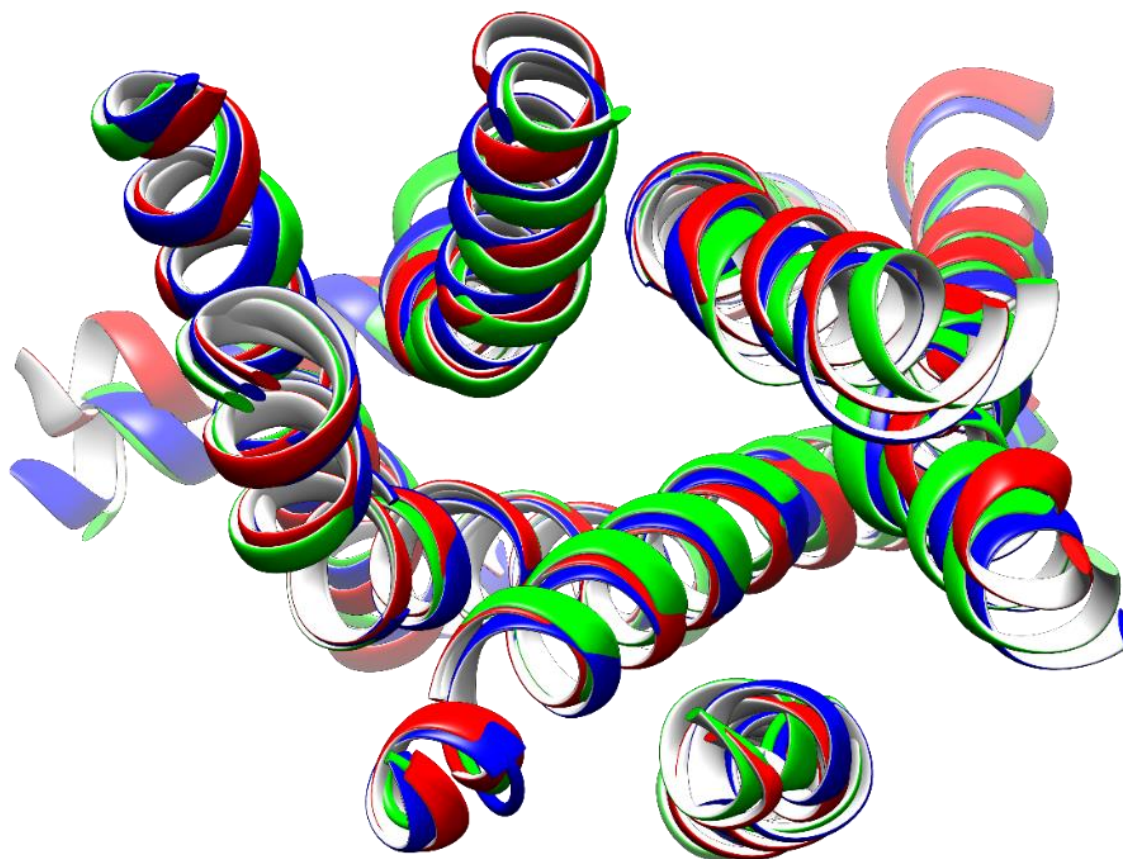

**Figure S27.** Blind Docking for Structures 5IU2 and 7NA8. The endogenous ligand within the active site is shown with a 97.00% (RMSD = 3.18) population for 5IU2 and 97.74% (RMSD = 5.57) among 1500 independent dockings within the specified active site for this protein.

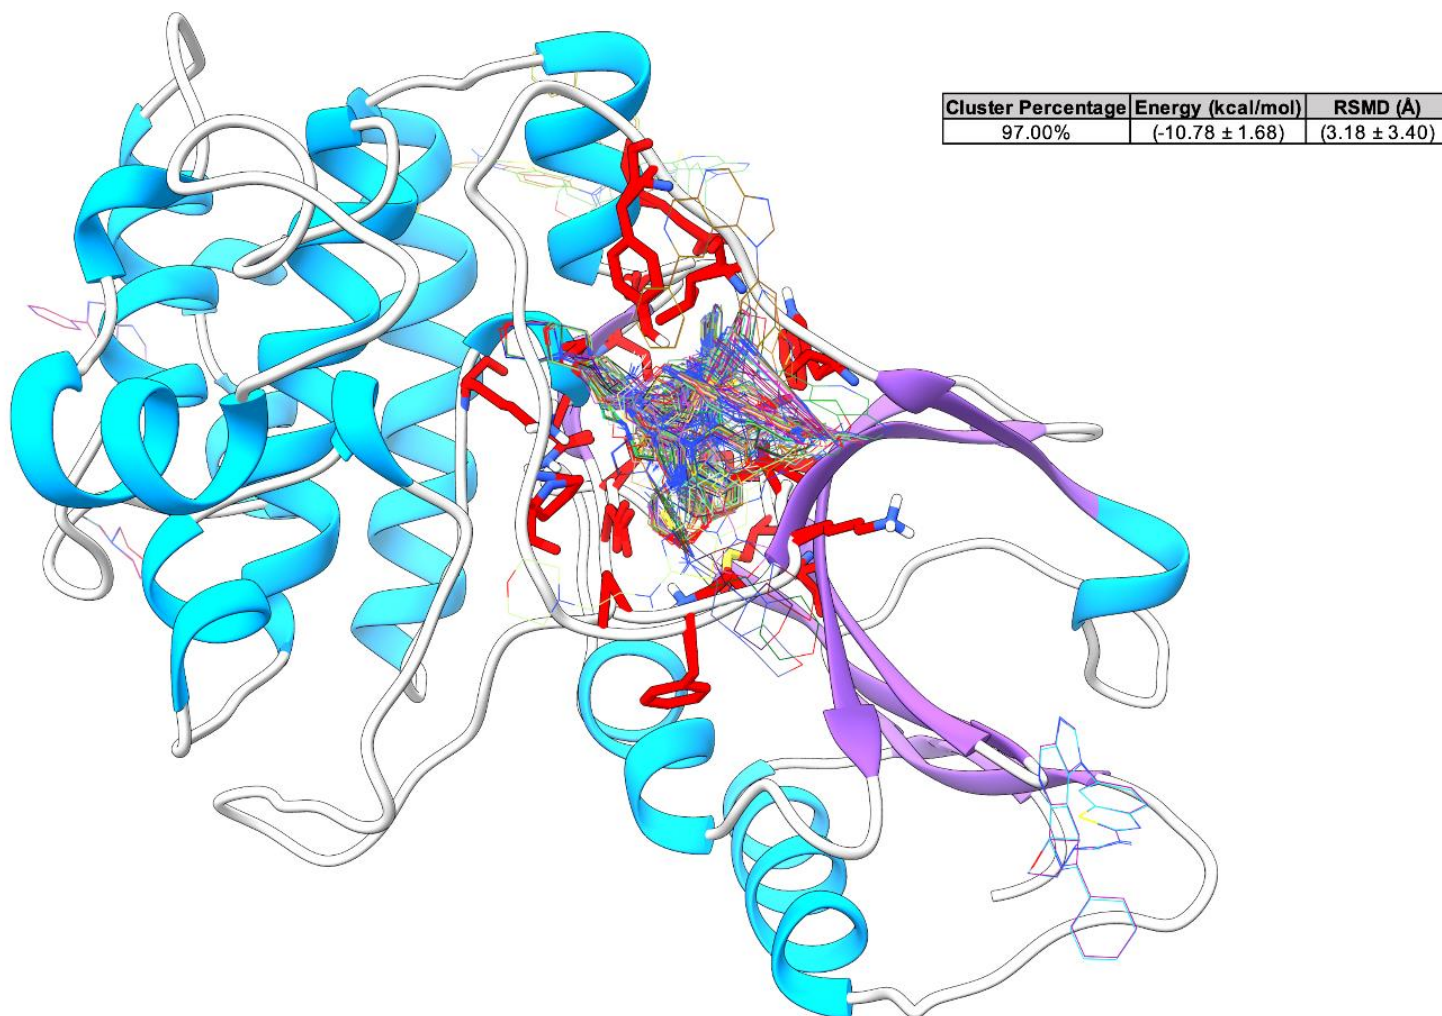

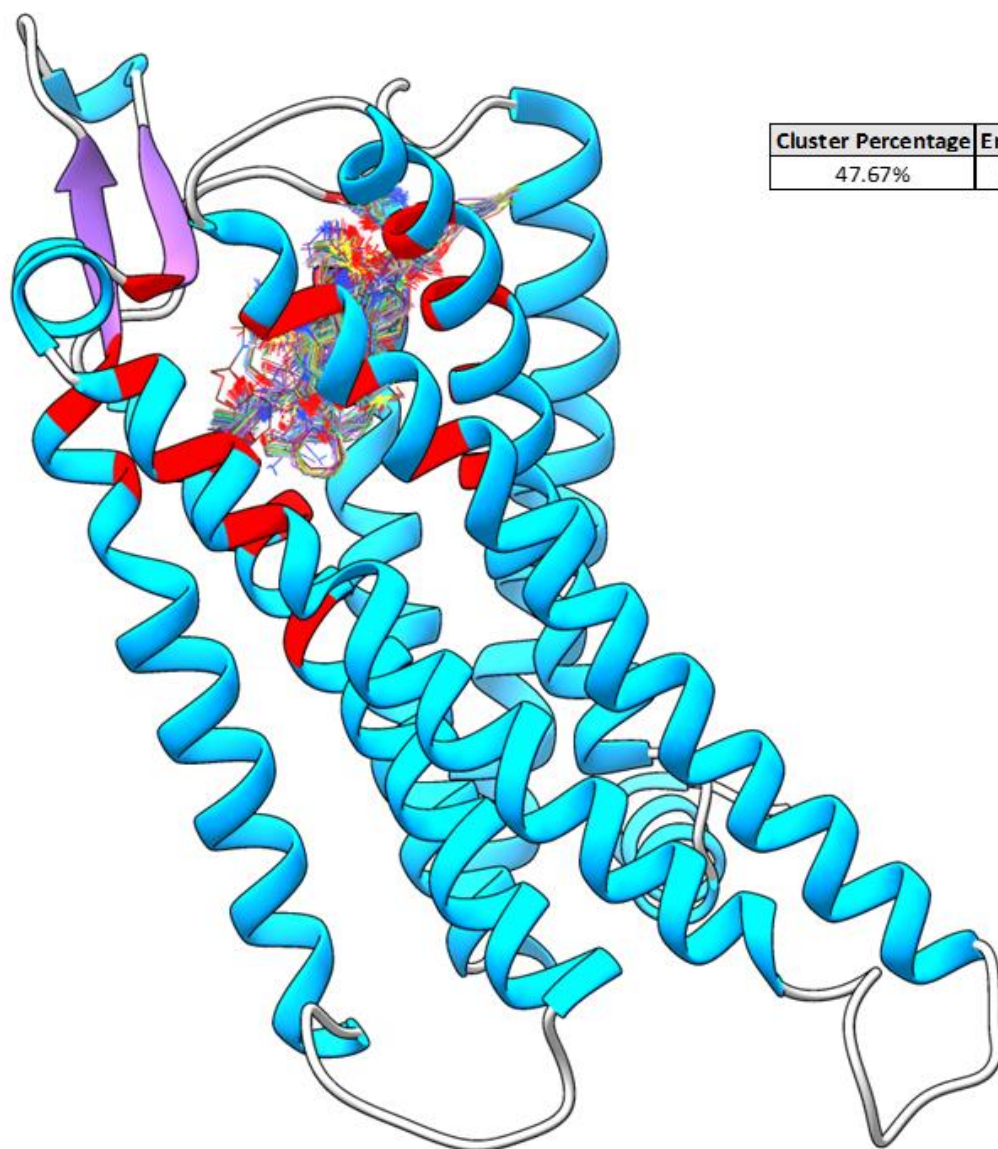

| Cluster Percentage | Energy (Kcal/mol)   | RMSD (Å)          |
|--------------------|---------------------|-------------------|
| 47.67%             | $(-10.45 \pm 0.40)$ | $(5.57 \pm 0.03)$ |

**Movie 1.** Molecular Simulation of the AKT<sub>1</sub> Target Protein with Ligand **1f**. In this simulation, the linking loop is initially observed to be uncoiled and away from the catalytic site. As the simulation progresses, the loop eventually coils back, approaches, and anchors itself to the protein's center. Ligand **1f** within the allosteric site is shown obstructing the loop's anchoring site. While the simulation was conducted in an explicit water environment, the waters were removed to facilitate the visualization of the linking loop's movement between the kinase and Ph domains. The protein AKT<sub>1</sub> is represented in purple/yellow ribbons, and the ligand is represented as spheres.

[https://drive.google.com/file/d/1ZS52LhqK\\_uTNsacDJWMA2V44yNeYZwa4/view?usp=sharing](https://drive.google.com/file/d/1ZS52LhqK_uTNsacDJWMA2V44yNeYZwa4/view?usp=sharing)

**Movie 2.** Molecular Simulation of the Ox<sub>2</sub>R Target Protein with Ligand **1f**. This simulation displays the complete system, including water (liquid) in cyan, lipids in gray, the protein in purple/yellow ribbons, and the ligand in cyan spheres within the active site. The ligand's movements are observed, and it does not undergo significant structural changes, remaining anchored in the active site of the Ox<sub>2</sub>R receptor.

<https://drive.google.com/file/d/1ApBgUpEaQPDrsO-mouB-wKyzFvhr3Jn9/view?usp=sharing>

## 5 Supplementary References

[S1] Morales-Salazar, I.; Montes-Enríquez, F.P.; Garduño-Albino, C.E.; García-Sánchez, M.A.; Ibarra, I.A.; Rojas-Aguirre, Y.; García-Hernández, M.E.; Sarmiento-Silva, R.E.; Alcaraz-Estrada, S.L.; Díaz-Cervantes, E.; González-Zamora, E.; Islas-Jácome, A. Synthesis of bis-furyl-pyrrolo[3,4-*b*]pyridin-5-ones *via* Ugi–Zhu reaction and *in vitro* activity assays against human SARS-CoV-2 and *in silico* studies on its main proteins. *RSC Med. Chem.* **2023**, *14*, 154–165. DOI: 10.1039/d2md00350c.

[S2] Morales-Salazar, I.; Rincón-Guevara, M.A.; González-Zamora, E.; Islas-Jácome, A. 2-Benzyl-3-morpholino-7-(thiophen-2-yl)-6-(thiophen-2-ylmethyl)-6,7-dihydro-5H-pyrrolo[3,4-*b*]pyridin-5-one. *Molbank* **2022**, *4*, M1503. DOI: 10.3390/M1503.
